# Supplementary material for: Classification of aerosol-generating procedures: a rapid systematic review
Source: PubMed Central journal article supplement — BMJ Open Respir Res. 2020 Oct 9;7(1):e000730. doi: 10.1136/bmjresp-2020-000730 (PMC7549490; doi:10.1136/bmjresp-2020-000730), 2020-10-09
Supplement: bmjresp-2020-000730supp001.pdf [file bmjresp-2020-000730supp001.pdf]

# Classification of Aerosol-Generating Procedures: A Rapid Systematic Review

## Online Appendices

Corresponding Authors: Prof Sebastian Straube and Prof Trisha Greenhalgh

Authors: Tanya Jackson PhD, Danika Deibert BSc, Graeme Wyatt BA, Quentin Durand-Moreau MD, Anil Adishes MD, Prof Kamlesh Khunti MD, Sachin Khunti MSc, Simon Smith PhD, Xin Hui Chan DPhil, Prof Lawrence Ross MD, Nia Roberts, Elaine Toomey PhD, Prof Trisha Greenhalgh PhD, Isheeta Arora, Susannah M Black, Jonathan Drake, Nandana Syam, Robert Temple, Prof Sebastian Straube DPhil

## Appendix 1

### PRISMA Checklist

| #  | Topic                              | Checklist item                                                                                                                                                                                                                                                                                              | Section      |
|----|------------------------------------|-------------------------------------------------------------------------------------------------------------------------------------------------------------------------------------------------------------------------------------------------------------------------------------------------------------|--------------|
| 1  | Title                              | Identify the report as a systematic review, meta-analysis, or both.                                                                                                                                                                                                                                         | Title        |
| 2  | Structured summary                 | Provide a structured summary including, as applicable: background; objectives; data sources; study eligibility criteria, participants, and interventions; study appraisal and synthesis methods; results; limitations; conclusions and implications of key findings; systematic review registration number. | Abstract     |
| 3  | Rationale                          | Describe the rationale for the review in the context of what is already known.                                                                                                                                                                                                                              | Introduction |
| 4  | Objectives                         | Provide an explicit statement of questions being addressed with reference to participants, interventions, comparisons, outcomes, and study design (PICOS).                                                                                                                                                  | Introduction |
| 5  | Protocol and registration          | Indicate if a review protocol exists, if and where it can be accessed (e.g., Web address), and, if available, provide registration information including registration number.                                                                                                                               | Methods      |
| 6  | Eligibility criteria               | Specify study characteristics (e.g., PICOS, length of follow-up) and report characteristics (e.g., years considered, language, publication status) used as criteria for eligibility, giving rationale.                                                                                                      | Methods      |
| 7  | Information sources                | Describe all information sources (e.g., databases with dates of coverage, contact with study authors to identify additional studies) in the search and date last searched.                                                                                                                                  | Methods      |
| 8  | Search                             | Present full electronic search strategy for at least one database, including any limits used, such that it could be repeated.                                                                                                                                                                               | Appendices   |
| 9  | Study selection                    | State the process for selecting studies (i.e., screening, eligibility, included in systematic review, and, if applicable, included in the meta-analysis).                                                                                                                                                   | Methods      |
| 10 | Data collection process            | Describe method of data extraction from reports (e.g., piloted forms, independently, in duplicate) and any processes for obtaining and confirming data from investigators.                                                                                                                                  | Methods      |
| 11 | Data items                         | List and define all variables for which data were sought (e.g., PICOS, funding sources) and any assumptions and simplifications made.                                                                                                                                                                       | Methods      |
| 12 | Risk of bias in individual studies | Describe methods used for assessing risk of bias of individual studies (including specification of whether this was done at the study or outcome level), and how this information is to be used in any data synthesis.                                                                                      | N/A          |
| 13 | Summary measures                   | State the principal summary measures (e.g., risk ratio, difference in means).                                                                                                                                                                                                                               | Results      |
| 14 | Synthesis of results               | Describe the methods of handling data and combining results of studies, if done, including measures of consistency (e.g., $I^2$ ) for each meta-analysis.                                                                                                                                                   | Results      |

| #  | Topic                         | Checklist item                                                                                                                                                                                           | Section    |
|----|-------------------------------|----------------------------------------------------------------------------------------------------------------------------------------------------------------------------------------------------------|------------|
| 15 | Risk of bias across studies   | Specify any assessment of risk of bias that may affect the cumulative evidence (e.g., publication bias, selective reporting within studies).                                                             | N/A        |
| 16 | Additional analyses           | Describe methods of additional analyses (e.g., sensitivity or subgroup analyses, meta-regression), if done, indicating which were pre-specified.                                                         | N/A        |
| 17 | Study selection               | Give numbers of studies screened, assessed for eligibility, and included in the review, with reasons for exclusions at each stage, ideally with a flow diagram.                                          | Results    |
| 18 | Study characteristics         | For each study, present characteristics for which data were extracted (e.g., study size, PICOS, follow-up period) and provide the citations.                                                             | N/A        |
| 19 | Risk of bias within studies   | Present data on risk of bias of each study and, if available, any outcome level assessment (see item 12).                                                                                                | N/A        |
| 20 | Results of individual studies | For all outcomes considered (benefits or harms), present, for each study: (a) simple summary data for each intervention group (b) effect estimates and confidence intervals, ideally with a forest plot. | N/A        |
| 21 | Synthesis of results          | Present results of each meta-analysis done, including confidence intervals and measures of consistency.                                                                                                  | Appendices |
| 22 | Risk of bias across studies   | Present results of any assessment of risk of bias across studies (see Item 15).                                                                                                                          | N/A        |
| 23 | Additional analysis           | Give results of additional analyses, if done (e.g., sensitivity or subgroup analyses, meta-regression [see Item 16]).                                                                                    | N/A        |
| 24 | Summary of evidence           | Summarize the main findings including the strength of evidence for each main outcome; consider their relevance to key groups (e.g., healthcare providers, users, and policy makers).                     | Discussion |
| 25 | Limitations                   | Discuss limitations at study and outcome level (e.g., risk of bias), and at review-level (e.g., incomplete retrieval of identified research, reporting bias).                                            | Discussion |
| 26 | Conclusions                   | Provide a general interpretation of the results in the context of other evidence, and implications for future research.                                                                                  | Discussion |
| 27 | Funding                       | Describe sources of funding for the systematic review and other support (e.g., supply of data); role of funders for the systematic review.                                                               | Funding    |

## Appendix 2

### English Search Strategies

1. Medline: using the search term "aerosol generating procedures.mp" (as keyword)
2. Google, using the following search term combinations:
  - a. "aerosol generating procedure" AND guidelines
  - b. Physiotherapy:
    - i. HSE AND "aerosol generating procedures"
    - ii. "Physiotherapist ISCP aerosol generating procedures"
    - iii. "CSP aerosol generating procedures Chartered Society of Physiotherapists"
  - c. Canadian provinces/territories (other than Quebec, which was included in the French search):
    - i. British Columbia AND "health authority" AND "aerosol generating procedure"
    - ii. Alberta AND "health authority" AND "aerosol generating procedure"
    - iii. Saskatchewan AND "health authority" AND "aerosol generating procedure"
    - iv. Manitoba AND "health authority" AND "aerosol generating procedure"
    - v. Ontario AND "health authority" AND "aerosol generating procedure"
    - vi. New Brunswick AND "health authority" AND "aerosol generating procedure"
    - vii. Nova Scotia AND "health authority" AND "aerosol generating procedure"
    - viii. Prince Edward Island AND "health authority" AND "aerosol generating procedure"
    - ix. Newfoundland AND "health authority" AND "aerosol generating procedure"
    - x. Northwest Territories AND "health authority" AND "aerosol generating procedure"
    - xi. Nunavut AND "health authority" AND "aerosol generating procedure"
    - xii. Yukon AND "health authority" AND "aerosol generating procedure"
  - d. Site-specific searches:
    - i. "Aerosol generating procedures" AND site:nhs.uk, site:gov.uk, site:org.uk,site:gov.au, site:govt.nz

### French Search Strategies

1. Google, using the following search term combinations:
  - a. "procedures generant des aerosols", "interventions medicales pouvant generer des aerosols"
    - i. AND France
    - ii. AND Belgique
    - iii. AND Suisse
    - iv. AND Luxembourg
    - v. AND Quebec
  - b. (intervention OR procedure) generant "aerosols"
    - i. AND France
    - ii. AND Belgique
    - iii. AND Suisse
    - iv. AND Luxembourg
    - v. AND Quebec
    - vi. AND Cameroun
    - vii. AND Cote d'Ivoire
    - viii. AND Algerie

2. Site searches:
  - a. Haute Autorite de Sante: <https://www.has-sante.fr>
  - b. Agence Nationale de Securite Sanitaire, de l'alimentation, de l'environnement et du travail: <https://www.anses.fr/fr>
  - c. Sante Publique France : <https://www.santepubliquefrance.fr>
  - d. Societe Francaise de Medecine du Travail : <http://www.chu-rouen.fr/sfmt/pages/accueil.php>
  - e. Societe Francaise de Medecine d'Urgence : <https://www.sfm.u.org>
  - f. Societe de Reanimation de Langue Francaise : <https://www.srlf.org>
  - g. Societe de Pneumologie de Langue Francaise : <http://splf.fr>
  - h. Societe Francaise d'Hygiene Hospitaliere : <https://www.sf2h.net>
  - i. Societe Francaise de Sante Publique : <https://www.sfsp.fr>
  - j. Haut Conseil de la Sante Publique : <https://www.hcsp.fr/explore.cgi/Accueil>

## Appendix 3

### Included Documents

1. Agence canadienne des médicaments et des technologies de la santé. Risque de transmission d'une infection respiratoire aigüe au cours de l'intervention produisant des aérosols : étude méthodique. *Apen;us Technol l'ACMTS* 2013; 3: 4.
2. Agence de la santé publique du Canada. Lignes directrices : mesures de prévention et de contrôle des infections à l'intention des travailleurs de la santé dans les établissements de soins actifs et les établissements de soins de longue durée: grippe saisonnière. 2010.  
<https://www.canada.ca/fr/sante-publique/services/maladies-infectieuses/infections-nosocomiales-professionnelles/lignes-directrices-mesures-prevention-contrôle-infections-a-intention-travailleurs-sante-etablissements-soins-actifs-etablissements-soins-longue> (accessed Mar 31, 2020)
3. Agence de la santé publique du Canada. Lignes directrices sur la prévention et le contrôle du coronavirus du syndrome respiratoire du Moyen-Orient (CoV-SRMO) dans les établissements de soins actifs. 2016.  
<https://www.canada.ca/content/dam/phac-aspc/documents/services/publications/diseases-conditions/infection-prevention-control-guidance-middle-east-respiratory-syndrome-coronavirus-mers-cov-acute-care-settings/cov-srma-fra.pdf> (accessed Mar 26, 2020)
4. Agence nationale de sécurité sanitaire de l'alimentation, de l'environnement et du travail (ANSES). NOTE d'appui scientifique et technique de l'Agence nationale de sécurité sanitaire de l'alimentation, de l'environnement et du travail. 2020. <https://www.anses.fr/fr/system/files/AIR2020SA0046.pdf> (accessed Mar 31, 2020)
5. Alberta Health Services. Aerosol-generating medical procedure guidance tool novel coronavirus (COVID-19). 2020. <https://www.albertahealthservices.ca/topics/Page17091.aspx> (accessed May 6, 2020)
6. Alberta Health Services. Respiratory illness assessing the need for additional precautions (isolation). 2020.  
<https://www.albertahealthservices.ca/assets/healthinfo/ipc/hi-ipc-respiratory-additional-precautions-assessment.pdf> (accessed Mar 31, 2020)
7. Alberta Health Services. IPC diseases and conditions table recommendations for management of patients acute care. 2020.  
<https://www.albertahealthservices.ca/assets/healthinfo/ipc/hi-ipc-resource-manual-main-document.pdf> (accessed Mar 31, 2020)
8. Alberta Health Services. Care of the seriously or critically ill patient with possible or proven ebola virus disease (EVD). 2014.  
<https://www.albertahealthservices.ca/assets/info/hp/diseases/if-hp-dis-ebola-care-seriously-critically-ill.pdf> (accessed Mar 31, 2020)
9. Alberta Health Services. Restricted use of nebulized treatment for novel coronavirus (COVID-19). 2020.  
<https://insite.albertahealthservices.ca/main/assets/tls/ep/tls-ep-2019-covid-nebulizer-memo.pdf> (sign in required) (accessed Apr 6, 2020)
10. Alberta Health Services, Infection Prevention and Control. Continuing care IPC resource manual. 2018.  
<https://www.albertahealthservices.ca/info/Page6854.aspx> (accessed Apr 8, 2020)
11. Alberta Health Services, Provincial Critical Care Pediatric Communicable Disease Working Group. Care of the pediatric critically ill COVID-19 patient annex E. 2020.  
<https://www.albertahealthservices.ca/assets/info/ppih/if-ppih-covid-19-care-pediatric-critically-ill.pdf> (accessed Apr 6, 2020)
12. Amirav I, Newhouse MT. Transmission of coronavirus by nebulizer: a serious, underappreciated risk!. *Can Med Assoc J* 2020; 192: E346. doi:10.1503/cmaj.75066
13. ARTP COVID19 Group. COVID19 infection control issues for lung function. 2019.  
[https://www.artp.org.uk/write/MediaUploads/Standards/COVID19/ARTP\\_COVID19\\_Infection\\_Control\\_Issues\\_for\\_Lung\\_Function.pdf](https://www.artp.org.uk/write/MediaUploads/Standards/COVID19/ARTP_COVID19_Infection_Control_Issues_for_Lung_Function.pdf) (accessed May 19, 2020)
14. Australian Government Department of Health. Interim advice on non-inpatient care of persons with suspected or confirmed Coronavirus disease (COVID- 19), including use of personal protective equipment (PPE). 2020.  
<https://www.health.gov.au/sites/default/files/documents/2020/03/interim-advice-on-non-inpatient-care-of->

- [persons-with-suspected-or-confirmed-coronavirus-disease-2019-covid-19-including-use-of-personal-protective-equipment-ppe.pdf](#) (accessed Mar 26, 2020)
15. Australian Government Department of Health. Interim recommendations for the use of personal protective equipment (PPE) during hospital care of people with Coronavirus disease (COVID-19). 2020. <https://www.health.gov.au/sites/default/files/documents/2020/03/interim-recommendations-for-the-use-of-personal-protective-equipment-ppe-during-hospital-care-of-people-with-coronavirus-disease-2019-covid-19.pdf> (accessed Apr 23, 2020)
  16. BC Centre for Disease Control; BC Ministry of Health. Respiratory protection for health careworkers caring for potential or confirmed COVID-19 patients. 2020. <http://www.bccdc.ca/Health-Info-Site/Documents/Respiratory-protection-COVID19.pdf> (accessed Mar 31, 2020)
  17. Bolton L, Mills C, Wallace S, Brady MC on behalf of the Royal College of Speech and Language Therapists COVID-19 Advisory Group. Aerosol generating procedures, dysphagia assessment and COVID-19: a rapid review of the evidence. *Int J Lang Commun Disord* (in press). 2020.
  18. Centers for Disease Control and Prevention. Supplement I: infection control in healthcare, home, and community settings. 2004. <https://www.cdc.gov/sars/guidance/i-infection/index.html> (accessed Apr 28, 2020)
  19. Centre integre universitaire de sante et de services sociaux de l'Estrie - Centre hospitalaire universitaire de Sherbrooke. Mesures de prevention et contr6le des infections a appliquer pour les usagers suspectes ou confirmes covid-19 a l'urgence, hospitalisation en courte duree, cliniques externes et soins infirmiers courants. 2020. [https://www.santeestrie.gc.ca/clients/SanteEstrie/Conseils-sante/Infections-maladies/COVID-19/MESURES\\_DE\\_PREVENTION\\_ET\\_CONTR6LE\\_DES\\_INFECTI0NS\\_A\\_APPLIQUER\\_POUR\\_LES\\_USAGERS\\_SUSPECTES\\_OU\\_CONFIRMES\\_COVID.pdf](https://www.santeestrie.gc.ca/clients/SanteEstrie/Conseils-sante/Infections-maladies/COVID-19/MESURES_DE_PREVENTION_ET_CONTR6LE_DES_INFECTI0NS_A_APPLIQUER_POUR_LES_USAGERS_SUSPECTES_OU_CONFIRMES_COVID.pdf) (accessed Mar 31, 2020)
  20. Chan MT, Chow BK, Lo T, et al. Exhaled air dispersion during bag-mask ventilation and sputum suctioning-Implications for infection control. *Sci Rep* 2018; 8: 1-8. doi:10.1038/s41598-017-18614-1
  21. College of Respiratory Therapists of Ontario. Infection prevention & control: clinical best practice guideline. 2016. [http://www.crto.on.ca/pdf/PPG/Infection\\_Control\\_CBPG.pdf](http://www.crto.on.ca/pdf/PPG/Infection_Control_CBPG.pdf) (accessed Mar 25, 2020)
  22. Comite Protection Urgence Pandemie Influenza. Protection des travailleurs de la sante des departements d'urgence lors de pandemie d'influenza: expose de principes et enonce de positions, v.6.1. 2009. [https://www.amuq.gc.ca/assets/memoires-et-positions/Enonce\\_de\\_positions\\_Pandemie\\_Influenza\\_v6.1.pdf?phpMyAdmin=i%2CheTT%2CBhLkb96mm75DwflLeUjab](https://www.amuq.gc.ca/assets/memoires-et-positions/Enonce_de_positions_Pandemie_Influenza_v6.1.pdf?phpMyAdmin=i%2CheTT%2CBhLkb96mm75DwflLeUjab) (accessed Mar 30, 2020)
  23. Comite sur les infections nosocomiales du Quebec; Institut national de sante publique du Quebec. COVID-19: mesures de prevention et contr6le des infections pour les milieux de soins aigus: recommandations interinaires. 2020. <https://www.inspq.gc.ca/sites/default/files/covid/2906-mesures-prevention-milieux-soins-aigus-covid19.pdf> (accessed Mar 30, 2020)
  24. Cummings KJ, Martin SB, Lindsley WG, Othumpangat S, Blachere FM, Noti JD, et al. Exposure to influenza virus aerosols in the hospital setting: is routine patient care an aerosol generating procedure? *J Infect Dis* 2014; 210: 504-5. doi:10.1093/infdis/jiu127
  25. Davies A, Thomson G, Walker J, Bennett A. A review of the risks and disease transmission associated with aerosol generating medical procedures. *J Infect Prev* 2009; 10: 122-6. doi:10.1177/1757177409106456
  26. Department of Health and Social Care (DHSC); Public Health Wales (PHW); Public Health Agency (PHA) Northern Ireland; Health Protection Scotland (HPS); Public Health England. COVID-19: guidance for infection prevention and control in healthcare settings. 2020. [https://assets.publishing.service.gov.uk/government/uploads/system/uploads/attachment\\_data/file/874316/Infection\\_prevention\\_and\\_control\\_guidance\\_for\\_pandemic\\_coronavirus.pdf](https://assets.publishing.service.gov.uk/government/uploads/system/uploads/attachment_data/file/874316/Infection_prevention_and_control_guidance_for_pandemic_coronavirus.pdf) (accessed Mar 25, 2020)
  27. Department of Health and Wellness, Chief Public Health Office. Prince Edward Island guidelines for the management and control of COVID-19. 2020. [https://www.princeedwardisland.ca/sites/default/files/publications/20200311\\_guideline\\_covid-19\\_final.pdf](https://www.princeedwardisland.ca/sites/default/files/publications/20200311_guideline_covid-19_final.pdf) (accessed Mar 31, 2020)

28. Dubus J, Reyhler G, Lecellio L. Note d'information concernant l'utilisation des nebuliseurs durant l'épidémie du Covid-19. 2020. <http://splf.fr/wp-content/uploads/2020/03/note-information-GAT-Covid-19.pdf> (accessed Mar 31, 2020)
29. ERS Group 9.1, ERS Group 4.1. Recommendation from ERS Group 9.1 (respiratory function technologists/scientists) lung function testing during COVID-19 pandemic and beyond. 2020. <https://ers.app.box.com/s/zs1uu88wy51monr0ewd990itoz4tsn2h> (accessed May 19, 2020)
30. European Centre for Disease Prevention and Control. Infection prevention and control and preparedness for COVID-19 in healthcare settings. 2020. [https://www.ecdc.europa.eu/sites/default/files/documents/Infection-prevention-control-for-the-care-of-patients-with-2019-nCoV-healthcare-settings\\_update-31-March-2020.pdf](https://www.ecdc.europa.eu/sites/default/files/documents/Infection-prevention-control-for-the-care-of-patients-with-2019-nCoV-healthcare-settings_update-31-March-2020.pdf) (accessed Apr 22, 2020)
31. First Nations Health Authority. 2019 Novel Coronavirus (COVID-19) Guidance for community health nurses working in First Nations communities in British Columbia. 2020. <https://www.fnha.ca/what-we-do/communicable-disease-control/coronavirus> (accessed Mar 31, 2020)
32. Fitzgerald J; Government of Newfoundland and Labrador, Department of Health and Community Services, Office of the Chief Medical Officer. Personal protective equipment required for care of clients with or suspected of COVID-19. 2020. [http://www.nlm.ca/FileManager/coronavirus/docs/Personal\\_Protective\\_Equipment\\_Required\\_for\\_Care\\_of\\_Clients\\_With\\_or\\_Suspected\\_of\\_COVID-19.pdf](http://www.nlm.ca/FileManager/coronavirus/docs/Personal_Protective_Equipment_Required_for_Care_of_Clients_With_or_Suspected_of_COVID-19.pdf) (accessed Mar 31, 2020)
33. Givi B, Schiff BA, Chinn SB, et al. Safety recommendations for evaluation and surgery of the head and neck during the COVID-19 pandemic. *JAMA Otolaryngol - Head Neck Surg* 2020; published online March 31. doi:10.1001/jamaoto.2020.0780
34. Gouvernement du grand duché de Luxembourg, Ministère de la Santé, Direction de la Santé. COVID-19: Recommandations pour la protection du personnel de santé. 2020. (26 March 2020 version, no longer online.) (accessed Mar 31, 2020)
35. Gouvernement du grand duché de Luxembourg, Ministère de la Santé, Direction de la Santé. Stratégies d'utilisation des équipements de protection individuelles (EPI) lors de l'épidémie de SARS-CoV-2. 2020. <https://sante.public.lu/fr/espace-professionnel/recommandations/direction-sante/000-covid-19/000-covid-191-annexes/060-protections-du-personnel-de-sante.pdf> (accessed Apr 17, 2020)
36. Government of Canada. Infection prevention and control for coronavirus disease (COVID-19): interim guidance for acute healthcare settings. 2020. <https://www.canada.ca/en/public-health/services/diseases/2019-novel-coronavirus-infection/health-professionals/interim-guidance-acute-healthcare-settings.html> (accessed 25 Mar 2020).
37. Government of Saskatchewan. Infection prevention and control measures and initial management of persons who may be infected with a novel respiratory virus intended for use in emergency departments and ambulatory care settings. 2015. [https://www.ehealthsask.ca/services/resources/Resources/nrv-prevention-control\(1\).pdf](https://www.ehealthsask.ca/services/resources/Resources/nrv-prevention-control(1).pdf) (accessed Mar 26, 2020)
38. Government of the Hong Kong Special Administrative Region, Centre for Health Protection. Recommended PPE for routine patient care and performing aerosol-generating procedures (a) in hospitals/clinics for suspected or confirmed cases with novel influenza infection under different response levels. 2016. [https://www.chp.gov.hk/files/pdf/recommended\\_ppe\\_for\\_ni\\_eng.pdf](https://www.chp.gov.hk/files/pdf/recommended_ppe_for_ni_eng.pdf) (accessed Mar 25, 2020)
39. Groupe de travail du Conseil supérieur d'hygiène publique de France (2002-2003). Prévention et prise en charge de la tuberculose en France: synthèse et recommandations du groupe de travail du Conseil supérieur d'hygiène publique de France (2002-2003). *Rev Mal Respin* 2003; 2: 49.
40. Groupe de travail expertise - PMSD - hygiénistes dentaires et assistantes dentaires. Les risques professionnels, pendant la grossesse, pour les hygiénistes dentaires et les assistantes dentaires en cabinets privés: avis en matière de retrait préventif et affectation de la travailleuse enceinte ou qui allaite. 2019. <http://www.santeautravail.qc.ca/documents/5982116/08379013-6735-430c-b1ea-b3f810098b85> (accessed Mar 31, 2020)
41. Haut conseil de la santé publique. Avis relatif aux recommandations thérapeutiques dans la prise en charge du COVID-19 (complémentaire à l'avis du 5 mars 2020). 2020. [https://www.hcsp.fr/Explore.cgi/Telecharger?NomFichier=hcspa20200323\\_coronarscovrecomthrap.pdf](https://www.hcsp.fr/Explore.cgi/Telecharger?NomFichier=hcspa20200323_coronarscovrecomthrap.pdf) (accessed Mar 31, 2020)



42. Haut conseil de la sante publique. Avis relatif au traitement du linge, au nettoyage d'un logement ou de la chambre d'hospitalisation d'un patient confirme a coronavirus SARS-CoV-2 et a la protection des personnels. 2020. [https://www.hcsp.fr/Explore.cgi/Telecharger?NomFichier=hcspa20200218\\_corsarcovnetdeslocetprodespe\\_r.pdf](https://www.hcsp.fr/Explore.cgi/Telecharger?NomFichier=hcspa20200218_corsarcovnetdeslocetprodespe_r.pdf) (accessed Mar 31, 2020)
43. Health Protection Scotland; National Services Scotland. Aerosol generating procedures (AGPs). 2019. [https://hpspubsrepo.blob.core.windows.net/hps-website/nss/2893/documents/1\\_tbp-ir-agp-v1.pdf](https://hpspubsrepo.blob.core.windows.net/hps-website/nss/2893/documents/1_tbp-ir-agp-v1.pdf) (accessed April 22, 2020)
44. Health Protection Scotland; National Services Scotland. Transmission based precautions literature review: definitions of transmission based precautions. 2017. [https://hpspubsrepo.blob.core.windows.net/hps-website/nss/1719/documents/1\\_tbp-ir-definitions-v2.0.pdf](https://hpspubsrepo.blob.core.windows.net/hps-website/nss/1719/documents/1_tbp-ir-definitions-v2.0.pdf) (accessed Mar 26, 2020)
45. Health Service Executive. Aerosol generating procedures. 2013. <https://www.hpsc.ie/a-z/respiratory/influenza/seasonalinfluenza/infectioncontroladvice/File.3628.en.pdf> (accessed Mar 25, 2020)
46. Horizon Health Network/Reseau de sante. Infection prevention & control guidance for suspect COVID-19. 2020. <https://813.cupe.ca/files/2020/03/Bulletin-2b-attachment-IPC-Guidance-for-Suspect-COVID-19-March-1-6-2020.pdf> (accessed Mar 31, 2020)
47. HSE Health Protection Surveillance Centre. Use of PPE to support infection prevention and control practice when performing aerosol generating procedures on confirmed or clinically suspected COVID-19 cases in a pandemic situation. 2020. [https://www.hpsc.ie/a-z/respiratory/coronavirus/novelcoronavirus/guidance/infectionpreventionandcontrolguidance/aerosolgeneratingprocedures/AGPs for confirmed or possible COVID19 v2.0\\_23032020.pdf](https://www.hpsc.ie/a-z/respiratory/coronavirus/novelcoronavirus/guidance/infectionpreventionandcontrolguidance/aerosolgeneratingprocedures/AGPs for confirmed or possible COVID19 v2.0_23032020.pdf) (accessed Mar 31, 2020)
48. Infection Prevention and Control Nova Scotia. Ebola virus disease: infection prevention and control measures for prehospital, primary care and acute care settings in Nova Scotia. 2015. [https://ipc.gov.ns.ca/sites/default/files/DHW\\_IPC\\_Guidelines\\_for\\_EVD\\_Feb\\_2015\\_Final.pdf](https://ipc.gov.ns.ca/sites/default/files/DHW_IPC_Guidelines_for_EVD_Feb_2015_Final.pdf) (accessed Mar 31, 2020)
49. Institut national de sante publique du Quebec. Prevention de la transmission des maladies respiratoires severes d'origine infectieuse (MRSI), de l'influenza aviaire A(H5N1) et de la grippe A(H1N1) d'origine porcine dans les milieux de soins. 2009. [https://www.inspq.qc.ca/sites/default/files/publications/961\\_avisinfluenzaah5n1grippeah1n1miseajour.pdf](https://www.inspq.qc.ca/sites/default/files/publications/961_avisinfluenzaah5n1grippeah1n1miseajour.pdf) (Mar 26, 2020)
50. Institut national de sante publique du Quebec. Niveau de protection respiratoire requis chez les professionnels et le personnel soignant pratiquant en cabinet dentaire en lien avec la grippe A(H1N1) 2009. 2009. [https://www.inspq.qc.ca/sites/default/files/publications/1039\\_protectiondentairegrippe.pdf](https://www.inspq.qc.ca/sites/default/files/publications/1039_protectiondentairegrippe.pdf) (Mar 31, 2020)
51. Jones RM, Brosseau LM. Aerosol transmission of infectious disease. *J Occup Environ Med* 2015; 57: 501-8. doi:10.1097/JOM.0000000000000448
52. Judson SD, Munster VJ. Nosocomial transmission of emerging viruses via aerosol-generating medical procedures. *Vinuses* 2019; 11: 12. doi:10.3390/v111100940
53. La Direction des communications du ministere de la Sante et des Services sociaux. Mesures de prevention dans un contexte de pandémie d'influenza a l'intention des employeurs et travailleurs du Quebec. 2007. <https://publications.msss.gouv.qc.ca/msss/fichiers/2007/07-235-06.pdf> (accessed Mar 31, 2020)
54. Lau JT, Fung KS, Wong TW, et al. SARS transmission among hospital workers in Hong Kong. *Emerg Infect Dis* 2004; 10: 280-6. doi:10.3201/eid1002.030534
55. Li J, Leavey A, Yang W, et al. Defining aerosol generating procedures and pathogen transmission risks in healthcare settings. *Open Forum Infect Dis* 2017; 4: S34-5. doi:10.1093/ofid/ofx162.085
56. Li Y, Huang X, Yu ITS, Wong TW, Qian H. Role of air distribution in SARS transmission during the largest nosocomial outbreak in Hong Kong. *Indoon Ain* 2004; 15: 83-95. doi:10.1111/j.1600-0668.2004.00317.x

57. Lim WS, Anderson SR, Read RC. Hospital management of adults with severe acute respiratory syndrome (SARS) if SARS re-emerges—updated 10 February 2004. *J Infect* 2004; 49: 1-7. doi:10.1016/j.jinf.2004.04.001
58. Lindsley WG, Noti JD, Blachere FM, Szalajda JV, Beezhold DH. Efficacy of face shields against cough aerosol droplets from a cough simulator. *J Occup Env Hyg* 2014; 11: 509-18. doi:10.1016/j.physbeh.2017.03.040
59. Lindsley WG, Pearce TA, Hudnall JB, et al. Quantity and size distribution of cough-generated aerosol particles produced by influenza patients during and after illness. *J Occup Environ Hyg* 2012; 9: 443-9. doi:10.1080/15459624.2012.684582.
60. Lu D, Wang H, Yu R, Yang H, Zhao Y. Integrated infection control strategy to minimize nosocomial infection of coronavirus disease 2019 among ENT healthcare workers. *J Hosp Infect* 2020; 104: P454-5. doi:10.1016/j.jhin.2020.02.018
61. Magennis P. Guidance PPE for patients with emergency oropharyngeal and nasopharyngeal conditions whose COVID status is unknown. 2020. [https://www.baoms.org.uk/\\_userfiles/pages/files/professionals/covid\\_19/baoms\\_baos\\_covid\\_advice\\_update\\_25\\_march\\_2020\\_final.pdf](https://www.baoms.org.uk/_userfiles/pages/files/professionals/covid_19/baoms_baos_covid_advice_update_25_march_2020_final.pdf) (accessed May 5, 2020)
62. Manitoba Health Seniors and Active Living. Routine practices and additional precautions: preventing the transmission of infection in health care. 2019. <https://www.gov.mb.ca/health/publichealth/cdc/docs/ipc/rpap.pdf> (accessed Apr 2, 2020)
63. McGrath JA, O'Sullivan A, Bennett G, et al. Investigation of the quantity of exhaled aerosols released into the environment during nebulisation. *Pharmaceutics* 2019; 11: 9. doi:10.3390/pharmaceutics11020075
64. Ministère de la Santé et des Services sociaux. SP L01B Prévention des infections programme de formation: pandémie influenza. 2009. [https://publications.msss.gouv.qc.ca/msss/fichiers/formation-pandemie/SP-L01B\\_prevention\\_des\\_infections.pdf](https://publications.msss.gouv.qc.ca/msss/fichiers/formation-pandemie/SP-L01B_prevention_des_infections.pdf) (accessed Mar 31, 2020)
65. Ministère de la Santé et des Soins de longue durée, Gouvernement de l'Ontario. Plan ontarien de lutte contre la pandémie de grippe chapitre 5: santé et sécurité au travail; prévention et contrôle des infections. 2013. [http://www.health.gov.on.ca/fr/pro/programs/emb/pan\\_flu/docs/ch\\_05.pdf](http://www.health.gov.on.ca/fr/pro/programs/emb/pan_flu/docs/ch_05.pdf) (accessed Mar 31, 2020)
66. Ministère de la Santé Ontario. COVID-19 : document d'orientation sur les soins actifs. 2020. [http://www.health.gov.on.ca/fr/pro/programs/publichealth/coronavirus/docs/2019\\_acute\\_care\\_guidance.pdf](http://www.health.gov.on.ca/fr/pro/programs/publichealth/coronavirus/docs/2019_acute_care_guidance.pdf) (accessed Mar 31, 2020)
67. Ministry of Health - Manatu Hauora. COVID-19 questions and answers for primary health care workers. 2020. <https://www.health.govt.nz/our-work/diseases-and-conditions/covid-19-novel-coronavirus/covid-19-resources-health-professionals/covid-19-primary-care/covid-19-questions-and-answers-primary-health-care-workers> (accessed Apr 23, 2020)
68. Moses R. COVID 19: respiratory physiotherapy on call information and guidance. 2020. [https://www.acprc.org.uk/Data/Resource\\_Downloads/COVID19RespiratoryPhysiotherapyOnCallInformationandGuidanceV2.pdf?date=07/04/2020](https://www.acprc.org.uk/Data/Resource_Downloads/COVID19RespiratoryPhysiotherapyOnCallInformationandGuidanceV2.pdf?date=07/04/2020) (accessed Apr 2, 2020)
69. New Brunswick Association of Respiratory Therapists. Position statement aerosol generating medical procedures during an H1N1 influenza A pandemic. 2020. <https://www.nbart.ca/en/nbart-position-statements/position-statement-aerosol-generating-medical-procedures-during-an-h1n1-influenza-a-pandemic.html> (accessed Apr 1, 2020)
70. New Brunswick Department of Health. Droplet contact precautions modified for patients with suspected or confirmed Ebola Virus Disease (EVD) in New Brunswick health care settings. 2014. <https://www2.gnb.ca/content/dam/gnb/Departments/h-s/pdf/en/CDC/DropletContactModifiedEVD.pdf> (accessed Mar 31, 2020)
71. Newfoundland & Labrador Department of Health & Community Services. Routine practices and additional precautions across the continuum of care. 2014. [https://www.health.gov.nl.ca/health/publichealth/cdc/routine\\_practices\\_and\\_additional\\_precautions.pdf](https://www.health.gov.nl.ca/health/publichealth/cdc/routine_practices_and_additional_precautions.pdf) (accessed Mar 31, 2020)
72. Northwest Territories Health and Social Services. Northwest Territories infection prevention and control manual. 2012.

- <https://www.hss.gov.nt.ca/professionals/sites/professionals/files/resources/infection-control-manual.pdf> (accessed Mar 31, 2020)
73. Nova Scotia Health Authority. 2019 novel coronavirus disease (COVID-19): aerosol generating medical procedures in healthcare settings. 2020. <https://www.cdha.nshealth.ca/system/files/sites/documents/aqmps-2019-novel-coronavirus-march-2020-final.pdf> (accessed Mar 31, 2020)
  74. Nova Scotia Labour and Workforce Development. Best practice guideline for workplace health and safety during pandemic influenza. 2009. <https://novascotia.ca/lae/docs/PandemicInfluenza.pdf> (accessed Mar 31, 2020)
  75. O'Neil CA, Li J, Leavey A, et al. Characterization of aerosols generated during patient care activities. *Clin Infect Dis* 2017; 65: 1342-8. doi:10.1093/cid/cix535
  76. Ontario Physiotherapy Association. Respiratory physiotherapy, personal protective equipment & COVID-19. 2020. <https://opa.on.ca/advocacy-positions/where-we-stand/> (accessed Apr 5, 2020)
  77. Ordre des thérapeutes respiratoires de L'Ontario. Prevention et lutte contre les infections: lignes directrices sur les pratiques cliniques exemplaires. 2016. [http://www.crto.on.ca/pdf/fr/PPG/Infection\\_Control\\_CBPG\\_fr.pdf](http://www.crto.on.ca/pdf/fr/PPG/Infection_Control_CBPG_fr.pdf) (accessed Mar 31, 2020)
  78. Ordre professionnel des inhalothérapeutes du Québec. La prévention des infections: guide de pratique clinique à l'intention des inhalothérapeutes cliniciens. 2019. [https://www.opiq.qc.ca/wp-content/uploads/2019/06/OPIQ\\_Guide\\_Infections\\_VF.pdf](https://www.opiq.qc.ca/wp-content/uploads/2019/06/OPIQ_Guide_Infections_VF.pdf) (accessed Mar 31, 2020)
  79. Oregon Health Authority. Provisional guidance: clinical care and healthcare infection prevention and control for Covid-19. 2020. <https://sharesystems.dhs.ohio.state.us/DHSForms/Served/le2288J.pdf> (accessed Mar 26, 2020)
  80. Organization mondiale de la Santé. Comment mettre et enlever les équipements de protection individuelle (EPI). 2008. [https://www.who.int/csr/resources/publications/PPE\\_FR\\_A1june11s.pdf](https://www.who.int/csr/resources/publications/PPE_FR_A1june11s.pdf) (accessed Mar 31, 2020)
  81. Organization mondiale de la Santé. Préparation et action en cas de grippe pandémique: document d'orientation de l'OMS. 2009. [http://whqlibdoc.who.int/publications/2009/9789242547689\\_fre.pdf](http://whqlibdoc.who.int/publications/2009/9789242547689_fre.pdf) (accessed Mar 30, 2020)
  82. Organisation mondiale de la Santé. Prévenir et combattre les maladies respiratoires aiguës à tendance épidémique ou pandémique dans le cadre des recommandations provisoires de l'OMS. 2007. [https://www.who.int/csr/resources/publications/CDS\\_EPR\\_2007\\_6frw.pdf](https://www.who.int/csr/resources/publications/CDS_EPR_2007_6frw.pdf) (accessed Mar 31, 2020)
  83. Population Health Directorate, Chief Dental Officer & Dentistry Division. Scotland Chief Dental Officer COVID-19 letter on remuneration and AGPs. 2020. [https://www.gdc-uk.org/docs/default-source/covid-19/use-of-aerosol-generating-procedures-\(agps\).pdf?sfvrsn=5a95b3b3\\_2](https://www.gdc-uk.org/docs/default-source/covid-19/use-of-aerosol-generating-procedures-(agps).pdf?sfvrsn=5a95b3b3_2) (accessed Mar 25, 2020)
  84. Prince Edward Island Department of Health. Prince Edward Island pandemic influenza contingency plan for the health sector. 2006. <http://www.gov.pe.ca/photos/original/influenza121806.pdf> (accessed Mar 31, 2020)
  85. Centre intégré universitaire de santé et de services sociaux de la Mauricie-et-du-Centre-du-Québec. Guide de prévention et de contrôle des infections: pratiques de base et précautions additionnelles. 2018. [https://ciussmcsq.ca/Content/Client/Librairie/Documents/RNI/GD15D003\\_3\\_.pdf](https://ciussmcsq.ca/Content/Client/Librairie/Documents/RNI/GD15D003_3_.pdf) (accessed Mar 31, 2020)
  86. Provincial Infection Control Network of British Columbia. 2019 novel coronavirus: aerosol generating medical procedures in healthcare settings. 2020. <https://www2.gov.bc.ca/assets/gov/health/about-bc-s-health-care-system/office-of-the-provincial-health-officer/reports-publications/covid-19-aerosol-generating-medical-procedures.pdf> (accessed Mar 31, 2020)
  87. Provincial Infection Control Network of British Columbia. Respiratory infection outbreak guidelines for health care facilities. 2018. [https://www.picnet.ca/wp-content/uploads/Respiratory-Infection-Outbreak-Guidelines-for-Healthcare-Facilities\\_November-2018.pdf](https://www.picnet.ca/wp-content/uploads/Respiratory-Infection-Outbreak-Guidelines-for-Healthcare-Facilities_November-2018.pdf) (accessed Mar 31, 2020)
  88. Public Health Agency of Canada. Annex F: prevention and control of influenza during a pandemic for all healthcare settings - pandemic influenza: aerosol-generating medical procedures. 2011. <http://www.phac-aspc.gc.ca/cpip-pclcpi/assets/pdf/ann-f-eng.pdf> (accessed Apr 5, 2020)

89. Public Health Agency of Canada, Centre for Communicable Diseases and Infection Control (Canada). Routine practices and additional precautions for preventing the transmission of infection in healthcare settings. 2016. <https://www.canada.ca/en/public-health/services/publications/diseases-conditions/routine-practices-precautions-healthcare-associated-infections.html> (accessed Mar 31, 2020)
90. Public Health England. COVID-19 personal protective equipment (PPE). 2020. <https://www.gov.uk/government/publications/wuhan-novel-coronavirus-infection-pr> (accessed Apr 23, 2020)
91. Public Health England. Guidance: transmission characteristics and principles of infection prevention and control. 2020. <https://www.gov.uk/government/publications/wuhan-novel-coronavirus-infection-prevention-and-control/transmission-characteristics-and-principles-of-infection-prevention-and-control> (accessed Apr 22, 2020)
92. Public Health Ontario. Infection prevention and control for clinical office practice. 2015. <https://www.publichealthontario.ca/en/health-topics/infection-prevention-control/clinical-office-practice> (accessed Mar 25, 2020)
93. Public Health Ontario. Updated IPAC recommendations for use of personal protective equipment for care of individuals with suspect or confirmed COVID-19. 2020. <https://www.publichealthontario.ca/-/media/documents/ncov/updated-ipac-measures-covid-19.pdf?la=en> (accessed Mar 31, 2020)
94. Rule AM, Apau O, Ahrenholz SH, et al. Healthcare personnel exposure in an emergency department during influenza season. *PLoS One* 2018; 13: e0203223. doi:10.1371/journal.pone.0203223
95. Santaripa JL, Rivera DN, Herrera V, et al. Transmission potential of SARS-CoV-2 in viral shedding observed at the University of Nebraska Medical Center. *medRxiv* 2020; published online March 26. doi:10.1101/2020.03.23.20039446
96. Sante et Services sociaux Quebec. Questions/reponses en lien avec l'equipement de protection individuelle - COVID-19 - Quebec - en date du 19 mars 2020. 2020. [https://www.santeestrie.gc.ca/clients/SanteEstrie/Conseils-sante/Infections-maladies/COVID-19/MESURES\\_DE\\_PREVENTION\\_ET\\_CONTROL\\_DES\\_INFECTIIONS\\_A\\_APPLIQUER\\_POUR\\_LES\\_USAGERS\\_SUSPECTES\\_OU\\_CONFIRMES\\_COVID.pdf](https://www.santeestrie.gc.ca/clients/SanteEstrie/Conseils-sante/Infections-maladies/COVID-19/MESURES_DE_PREVENTION_ET_CONTROL_DES_INFECTIIONS_A_APPLIQUER_POUR_LES_USAGERS_SUSPECTES_OU_CONFIRMES_COVID.pdf) (accessed Mar 31, 2020)
97. Sante et Services sociaux Quebec. Synthese des recommandations sur les mesures individuelles de prevention dans le contexte de presence du syndrome respiratoire aigu severe (SRAS) tableaux pour les differentes situations de travail. 2004. <https://publications.msss.gouv.qc.ca/msss/fichiers/2004/04-210-03W.pdf> (accessed Mar 31, 2020)
98. Sante et Services sociaux Quebec, Sous-comite ministeriel COVID-19 des soins critiques. Guide de procedures techniques soins intensifs et urgence SARS-CoV-2 (COVID-19). 2020. <https://msss.gouv.qc.ca/professionnels/documents/coronavirus-2019-ncov/2020-04-06-guide-procedure-soins-intensifs-urgence-covid-19.pdf> (accessed Mar 31, 2020)
99. Sante publique Ontario. Recommandations actualisees en PCI concernant l'utilisation d'equipements de protection individuelle pour la prise en charge des personnes dont l'infection a la COVID-19 est presumee ou confirmee. 2020. <https://www.publichealthontario.ca/-/media/documents/ncov/updated-ipac-measures-covid-19.pdf?la=fr> (accessed Mar 31, 2020)
100. Seto WH, Tsang D, Yung RW, et al. Effectiveness of precautions against droplets and contact in prevention of nosocomial transmission of severe acute respiratory syndrome (SARS). *Lancet* 2003; 361: 1519-20. doi:10.1016/S0140-6736(03)13168-6
101. Shared Health Manitoba. COVID-19 provincial guidance for aerosol generating medical procedures (AGMPs). 2020. <https://sharedhealthmb.ca/files/aerosol-generating-medical-procedures-AGMPs.pdf> (accessed May 4, 2020)
102. Siegel JD, Rhinehart E, Jackson M, Chiarello L. 2007 Guideline for isolation precautions: preventing transmission of infectious agents in healthcare settings. 2009. <https://www.cdc.gov/niosh/docket/archive/pdfs/NIOSH-219/0219-010107-siegel.pdf> (accessed Apr 7, 2020)
103. Societe canadienne de soins intensifs; Association canadienne des medecins d'urgence; Association pour la microbiologie medicale et l'infectiologie Canada. Guide de pratique clinique pour la prise en charge de

- la maladie a virus Ebola: guide a l'intention des cliniciens du Canada. 2014.  
[https://caep.ca/wp-content/uploads/2016/03/ebola\\_clinical\\_care\\_guideline\\_french\\_201505.pdf](https://caep.ca/wp-content/uploads/2016/03/ebola_clinical_care_guideline_french_201505.pdf) (accessed Mar 31, 2020)
104. Societe canadienne des therapeutes respiratoires. Enonce de position interventions medicales pouvant generer des aerosols durant une eclosion grave d'une maladie cardio-pulmonaire. 2014.\_  
[https://www.csr.com/wp-content/uploads/Interventions\\_medicales\\_pouvant\\_generer\\_des\\_aerosols...-Oci\\_2014.pdf](https://www.csr.com/wp-content/uploads/Interventions_medicales_pouvant_generer_des_aerosols...-Oci_2014.pdf) (accessed Mar 31, 2020)
105. Societe de pneumologie de langue Fran;aise. Precautions particulieres pour la realisation d'une endoscopie bronchique durant la phase epidemique COVID-19 recommandations de la Societe de pneumologie de langue Fran;aise (SPLF). 2020.  
<http://splf.fr/wp-content/uploads/2020/03/Precautions-particulieres-endocopie-bronchique.pdf> (accessed Mar 31, 2020)
106. Societe de reanimation de langue Fran;aise, Societe Fran;aise d'anesthesie et de reanimation, Societe Fran;aise d'hygiene hospitaliere, Societe de pathologie infectieuse de langue Fran;aise, Groupe Francophone de reanimation et urgences pediatriques. Recommandations d'experts portant sur la prise en charge en reanimation des patients en periode d'epidemie a SARS-CoV2 (Version 4 du 07/04/2020). 2020.  
<https://sfar.org/download/recommandations-dexperts-portant-sur-la-prise-en-charge-en-reanimation-des-patients-en-periode-depidemie-a-sars-cov2/?wpdmcl=25387&refresh=5e975e48dc18b1586978376> (accessed Apr 27)
107. Societe de formation therapeutique du generaliste. Hygiene et prevention du risque infectieux en cabinet medical ou paramedical. 2007.  
[https://www.has-sante.fr/upload/docs/application/pdf/hygiene\\_au\\_cabinet\\_medical\\_-\\_recommandations\\_2007\\_11\\_27\\_18\\_45\\_21\\_278.pdf](https://www.has-sante.fr/upload/docs/application/pdf/hygiene_au_cabinet_medical_-_recommandations_2007_11_27_18_45_21_278.pdf) (accessed Mar 31, 2020)
108. Societe fran;aise d'Hygiene Hospitaliere. Actualisation des precautions standard. Hygienes. 2017; 25.
109. Societe fran;aise de medecine du travail. Recommendation SFMT/MTPH du 23 Mars 2020. 2020.\_  
[http://www.chu-rouen.fr/sfmt/autres/Criteres\\_evictions\\_COVID-19\\_SFMT\\_23\\_mars\\_2020.pdf](http://www.chu-rouen.fr/sfmt/autres/Criteres_evictions_COVID-19_SFMT_23_mars_2020.pdf) (accessed Mar 31, 2020)
110. Standards Council of Canada. Selection, use, and care of respirators. 2018.\_  
<https://www.techstreet.com/products/preview/2026093> (accessed Apr 3, 2020)
111. Thomas P, Baldwin C, Bissett B, et al. Physiotherapy management for COVID-19 in the acute hospital setting: clinical practice recommendations. *J Physiother* 2020; 66: 73-82.  
doi:10.1016/j.jphys.2020.03.011
112. Thompson K, Pappachan JV, Bennett AM, et al. Influenza aerosols in UK hospitals during the H1N1 (2009) pandemic - the risk of aerosol generation during medical procedures. *PLoS One* 2013; 8: e56278.  
doi:10.1371/journal.pone.0056278
113. To KK, Tsang OT, Leung W, et al. Temporal profiles of viral load in posterior oropharyngeal saliva samples and serum antibody responses during infection by SARS-CoV-2: an observational cohort study. *Lancet Infect Dis* 2020; published online March 23. doi:10.1016/s1473-3099(20)30196-1
114. Tran K, Cimon K, Severn M, Pessoa-Silva CL, Conly J. Aerosol generating procedures and risk of transmission of acute respiratory infections to healthcare workers: a systematic review. *PLoS One* 2012; 7:e35797. doi:10.1371/journal.pone.0035797
115. Tran K, Cimon K, Severn M, Pessoa-Silva CL, Conly J, Canadian Agency for Drugs and Technologies in Health. Aerosol-generating procedures and risk of transmission of acute respiratory infections: a systematic review. 2011.  
[http://www.cadth.ca/media/pdf/M0023\\_Aerosol\\_Generating\\_Procedures\\_e.pdf/](http://www.cadth.ca/media/pdf/M0023_Aerosol_Generating_Procedures_e.pdf/) (accessed Mar 31, 2020)
116. U.S. Department of Labor, Occupational Safety and Health Administration; Department of Health and Human Services; CDC Workplace Safety and Health, National Institute for Occupational Safety and Health. Hospital respiratory protection program toolkit. 2015.\_  
<https://www.osha.gov/Publications/OSHA3767.pdf> (accessed Mar 26, 2020)
117. Vancouver Coastal Health. IPAC best practices guideline aerosol generating medical procedures. 2020.\_  
[http://ipac.vch.ca/Documents/Acute\\_Resource\\_manual/Aerosol\\_Generating\\_Medical\\_Procedures.pdf](http://ipac.vch.ca/Documents/Acute_Resource_manual/Aerosol_Generating_Medical_Procedures.pdf) (accessed Mar 25, 2020)

118. Wax RS, Christian MD. Practical recommendations for critical care and anesthesiology teams caring for novel coronavirus (2019-nCoV) patients. *Can J Anesth* 2020; published online February 12. doi:10.1007/s12630-020-01591-x
119. Winnipeg Regional Health Authority. Acute care infection prevention & control manual. 2017. <https://professionals.wrha.mb.ca/old/extranet/ipc/manuals-acute.php> (accessed Mar 31, 2020)
120. World Health Organization (WHO). Epidemic- and pandemic-prone acute respiratory diseases infection prevention and control in health care. 2008. [https://www.who.int/csr/resources/publications/EPR\\_AM3\\_E3.pdf?ua=1&fbclid=IwAR077X7MAM4fGNddXC-A6HfjifPYoS22KJcFj039wUJzn0H58mXOODDTUQ](https://www.who.int/csr/resources/publications/EPR_AM3_E3.pdf?ua=1&fbclid=IwAR077X7MAM4fGNddXC-A6HfjifPYoS22KJcFj039wUJzn0H58mXOODDTUQ) (accessed Apr 28, 2020)
121. World Health Organization (WHO). Infection prevention and control of epidemic- and pandemic-prone acute respiratory infections in health care: WHO guidelines. 2014. [http://apps.who.int/iris/bitstream/10665/112656/1/9789241507134\\_eng.pdf?ua=1](http://apps.who.int/iris/bitstream/10665/112656/1/9789241507134_eng.pdf?ua=1) (accessed Mar 26, 2020)
122. World Health Organization (WHO). Modes of transmission of virus causing COVID-19: implications for IPC precaution recommendations. 2020. <https://www.who.int/publications-detail/modes-of-transmission-of-virus-causing-covid-19-implications-f-or-ipc-precaution-recommendations> (accessed Mar 30, 2020)
123. Yu IT, Li Y, Wong TW, et al. Evidence of airborne transmission of the severe acute respiratory syndrome virus. *N Engl J Med* 2004; 350: 1731-9. doi:10.1056/NEJMoa032867
124. Yukon Communicable Disease Control. Provider update #2: expansion of 2019 novel coronavirus (2019-nCoV). 2020. <https://yukon.ca/sites/yukon.ca/files/hss/hss-novel-coronavirus-memo-27-01-2020.pdf> (accessed Mar 31, 2020)
125. Yukon Health and Social Services. Donning (putting on) personal protective equipment (PPE) - \*high risk. 2014. [http://www.hss.gov.yk.ca/pdf/ppe\\_donning\\_for\\_highrisk\\_encounters.pdf](http://www.hss.gov.yk.ca/pdf/ppe_donning_for_highrisk_encounters.pdf) (accessed Mar 31, 2020)
126. Zemouri C, De Soet H, Crielaard W, Laheij A. A scoping review on bio-aerosols in healthcare & the dental environment. *PLoS One* 2017; 12: e0178007. doi:10.1371/journal.pone.0178007
127. Zietsman M, Phan LT, Jones RM. Potential for occupational exposures to pathogens during bronchoscopy procedures. *J Occup Environ Hyg* 2019; 16: 707-16. doi:10.1080/15459624.2019.1649414
128. Zimmerman JL, Sprung CL. Chapter 8. Medical Procedures. Recommendations and standard operating procedures for intensive care unit and hospital preparations for an influenza epidemic or mass disaster. *Intensive Care Med* 2010; 36: S65-9. doi:10.1007/s00134-010-1766-z

## Appendix 4

### Excluded Documents

1. Anfinrud P, Stadnytskyi V, Bax CE, Bax A. Visualizing speech-generated oral fluid droplets with laser light scattering. *N Engl J Med* 2020; published online April 15. doi:10.1056/NEJMc2007800
2. Asadi S, Bouvier N, Wexler AS, Ristenpart WD. The coronavirus pandemic and aerosols: does COVID-19 transmit via expiratory particles? *Aerosol Sci Technol* 2020; 54: 635-8. doi:10.1080/02786826.2020.1749229
3. Bourouiba L. Turbulent gas clouds and respiratory pathogen emissions potential implications for reducing transmission of COVID-19. *JAMA* 2020; published online March 26. doi:10.1001/jama.2020.4756
4. Bourouiba L, Dehandschoewercker E, Bush JW. Violent expiratory events: on coughing and sneezing. *J Fluid Mech* 2014; 745: 537-63. doi:10.1017/jfm.2014.88
5. Brodsky MB, Huang M, Shanholtz C, et al. Recovery from dysphagia symptoms after oral endotracheal intubation in acute respiratory distress syndrome survivors: a 5-year longitudinal study. *Ann Am Thorac Soc* 2017; 14: 376-83. doi:10.1513/AnnalsATS.201606-455OC
6. Gonzalez J, Maisonabe J, Oranger M, Mendoza-Ruiz A. Appareillages respiratoires de domicile d'un malade suspect ou porteur du de virus respiratoire. 2020. <https://www.groupeveillecovid.fr/blog/2020/03/21/appareillages-respiratoires-de-domicile-dun-malade-suspect-porteur-de-virus-respiratoire/> (accessed Mar 31, 2020)
7. Harte JA. Standard and transmission-based precautions: an update for dentistry. *J Am Dent Assoc* 2010; 141: 572-81. doi:10.14219/jada.archive.2010.0232
8. Health and Safety Executive UK. Evaluation of existing PPE worn by NHS staff for assessment of a patient with a suspected high consequence infectious disease. 2019. <https://www.hse.gov.uk/research/rpdf/rr1147.pdf> (accessed Apr 2, 2020)
9. Howard J, Huang A, Li Z, Tufekci Z, Zdimar V, van der Westhuizen H. Face masks against COVID-19: an evidence review. Preprints 2020; published online April 12. doi:10.20944/preprints202004.0203.v1
10. Li Y, Leung GM, Tang JW, et al. Role of ventilation in airborne transmission of infectious agents in the built environment - a multidisciplinary systematic review. *Indoor Air* 2007; 17: 2-18. doi:10.1111/j.1600-0668.2006.00445.x
11. Lindsley WG, Reynolds JS, Szalajda J, Noti JD, Beezhold DH. A cough aerosol simulator for the study of disease transmission by human cough-generated aerosols. *Aerosol Sci Technol* 2013; 47: 937-44. doi:10.1126/science.1249098
12. Liu Y, Ning Z, Chen Y, et al. Aerodynamic characteristics and RNA concentration of SARS-CoV-2 aerosol in Wuhan hospitals during COVID-19 outbreak. *bioRxiv* 2020; published online March 10. doi:10.1101/2020.03.08.982637
13. Liu Y, Yan LM, Wan L, et al. Viral dynamics in mild and severe cases of COVID-19. *Lancet Infect Dis* 2020; published online March 19. doi:10.1016/S1473-3099(20)30232-2
14. Loeb M, McGeer A, Henry B, et al. SARS among critical care nurses, Toronto. *Emerg Infect Dis* 2004; 10: 251-5. doi:10.3201/eid1002.030838
15. Pyankov O V., Bodnev SA, Pyankova OG, Agranovski IE. Survival of aerosolized coronavirus in the ambient air. *J Aerosol Sci* 2018; 115: 158-63. doi:10.1016/j.jaerosci.2017.09.009
16. Radonovich LJ, Simberkoff MS, Bessesen MT, et al. N95 respirators vs medical masks for preventing influenza among health care personnel: a randomized clinical trial. *JAMA* 2019; 322: 824-33. doi:10.1001/jama.2019.11645
17. Ran L, Chen X, Wang Y, Wu W, Zhang L, Tan X. Risk factors of healthcare workers with Corona Virus disease 2019: a retrospective cohort study in a designated hospital of Wuhan in China. *Clin Infect Dis* 2020. doi:10.1093/cid/ciaa287
18. Scheel R, Pisegna JM, McNally E, Noordzij JP, Langmore SE. Endoscopic assessment of swallowing after prolonged intubation in the ICU setting. *Ann Otol Rhinol Laryngol* 2016; 125: 43-52. doi:10.1177/0003489415596755
19. Shiu E, Leung N, Cowling B. Controversy around airborne versus droplet transmission of respiratory viruses: implication for infection prevention. *Cunn Opin Infect Dis* 2019; 32: 372-9. doi:10.1097/QCO.0000000000000563
20. Societe fran;aise d'Hygiene Hospitaliere. Relatif au traitement du linge, au nettoyage des locaux ayant heberge un patient confirme a 2019-nCoV et a la protection des personnels. 2020. <https://www.sf2h.net/wp-content/uploads/2020/02/AVIS-SF2H-Prise-en-charge-linge-et-locaux-2019-nCoV-07-02-2020.pdf> (accessed Mar 31, 2020)
21. To KK, Tsang OT-Y, Yip C, et al. Consistent detection of 2019 novel coronavirus in saliva. *Clin Infect Dis* 2020; published online February 12. doi:10.1093/cid/ciaa149

22. Wolfel R, Corman VM, Guggemos W, et al. Virological assessment of hospitalized patients with COVID-2019. *Nature* 2020; published online April 1. doi:10.1038/s41586-020-2196-x
23. World Health Organization. Guidelines on core components of infection prevention and control programmes at the national and acute health care facility level. 2016. <https://www.who.int/gpsc/core-components.pdf> (accessed Mar 25, 2020)
24. Zhou F, Yu T, Du R, et al. Clinical course and risk factors for mortality of adult inpatients with COVID-19 in Wuhan, China: a retrospective cohort study. *Lancet* 2020; 395: 1054-62. doi:10.1016/S0140-6736(20)30566-3
25. Zhu SW, Kato S, Yang JH. Study on transport characteristics of saliva droplets produced by coughing in a calm indoor environment. *Build Environ* 2006; 41: 1691-702. doi:10.1016/j.buildenv.2005.06.024



## Appendix 5

### Aerosol-Generating Procedure Definitions

| Aerosol-Generating Procedure Definition                                                                                                                                                                                                                                                                                                                                                                                                                                                                             | Reference # in Appendix 3 |
|---------------------------------------------------------------------------------------------------------------------------------------------------------------------------------------------------------------------------------------------------------------------------------------------------------------------------------------------------------------------------------------------------------------------------------------------------------------------------------------------------------------------|---------------------------|
| "Medical intervention susceptible to generate aerosols because of an artificial manipulation of the patient's airways." ("interventions medicales pouvant generer des aerosols en raison d'une manipulation artificielle des voies respiratoires d'une personne.") p. 6                                                                                                                                                                                                                                             | 2                         |
| "Any procedure carried out on a patient that can induce the production of aerosols as a result of manipulation of a person's airway." p. 1                                                                                                                                                                                                                                                                                                                                                                          | 10                        |
| "AGMPs that generate small droplet nuclei in high concentration present a risk for airborne transmission of pathogens not otherwise able to spread by the airborne route (e.g. coronavirus, influenza)." p. 3                                                                                                                                                                                                                                                                                                       | 16                        |
| "Aerosol generating procedures (AGP) are defined as 'any medical and patient care procedure that results in the production of airborne particles (aerosols).'" p. 3                                                                                                                                                                                                                                                                                                                                                 | 17                        |
| "Procedures that stimulate coughing and promote the generation of aerosols..." p. 15                                                                                                                                                                                                                                                                                                                                                                                                                                | 18                        |
| "Certain medical procedures used in the treatment of acute respiratory infection may increase the risk of aerosol generation from a patient above that of natural processes (coughing etc). By inputting energy into the respiratory tract or inducing coughing or sneezing, these procedures could artificially generate aerosolised respiratory secretions." p. 123                                                                                                                                               | 25                        |
| "Certain medical and patient care activities that can result in the release of airborne particles (aerosols). AGPs can create a risk of airborne transmission of infections that are usually only spread by droplet transmission." p. 43                                                                                                                                                                                                                                                                            | 26                        |
| "Aerosol-generating medical procedures (AGMPs) are medical procedures that can generate aerosols as a result of artificial manipulation of a person's airway." p. 10                                                                                                                                                                                                                                                                                                                                                | 27                        |
| "AGMPs are medical procedures that can generate aerosols as a result of artificial manipulation of a person's airway." p. 1                                                                                                                                                                                                                                                                                                                                                                                         | 32                        |
| "Aerosol-generating medical procedures (AGMPs) are medical procedures that can generate aerosols as a result of artificial manipulation of a person's airway."                                                                                                                                                                                                                                                                                                                                                      | 36                        |
| "Procedures likely to increase cough..." (translated) p. 34                                                                                                                                                                                                                                                                                                                                                                                                                                                         | 39                        |
| "In addition, certain healthcare activities and procedures termed 'aerosol generating procedures' (AGPs) can generate aerosols, and create the potential for airborne transmission of infections that may otherwise only be transmissible by the droplet route." p. 7                                                                                                                                                                                                                                               | 43                        |
| "...'aerosol generating procedures' (AGPs) can generate aerosols, and create the potential for airborne transmission of infections that may otherwise only be transmissible by the droplet route." p. 7                                                                                                                                                                                                                                                                                                             | 44                        |
| "Aerosol-generating procedures (AGP) are procedures that stimulate coughing and promote the generation of aerosols." p. 1                                                                                                                                                                                                                                                                                                                                                                                           | 45                        |
| "When performing certain medical procedures on patients infected with respiratory viruses, including SARS-CoV-2, smaller droplets can be formed which are light enough to travel on air... Some procedures have been associated in studies with increased risk transmission of respiratory virus although it is not clear if this is because of airborne transmission or because there are aspects associated with the procedure that expose the operator to a high risk of infection by contact or droplets." p. 2 | 47                        |
| "In the context of infectious disease transmission, many bodily processes and medical procedures generate aerosols, and the aerosol particles may contain pathogens in conjunction with body fluids." p. 501                                                                                                                                                                                                                                                                                                        | 51                        |

| Aerosol-Generating Procedure Definition                                                                                                                                                                                                                                            | Reference # in Appendix 3 |
|------------------------------------------------------------------------------------------------------------------------------------------------------------------------------------------------------------------------------------------------------------------------------------|---------------------------|
| "Medical procedures that have the potential to create aerosols in addition to those that patients regularly form from breathing, coughing, sneezing, or talking are called AGMPs." p. 2                                                                                            | 52                        |
| "Procedures and practices that promote the generation of aerosols..." p. 4                                                                                                                                                                                                         | 57                        |
| "Aerosol-generating medical procedures (AGMPs) are medical procedures that can generate aerosols as a result of artificial manipulation of a person's airway." p. 7                                                                                                                | 62                        |
| "Aerosol generating procedures are those that produce droplets that are small enough to be widely dispersed." p. 4                                                                                                                                                                 | 67                        |
| "Aerosol-generating medical procedures (AGMPs) are any procedure carried out on a patient that can induce the production of aerosols of various sizes, including droplet nuclei." p. 1                                                                                             | 69                        |
| "Aerosol-generating medical procedures are medical procedures that can generate aerosols as a result of artificial manipulation of a person's airway." p. 99                                                                                                                       | 71                        |
| "AGMPs are medical procedures that can generate aerosols that consist of small droplet nuclei in high concentration and present a risk for airborne transmission of pathogens that would not otherwise be spread by the airborne route (e.g. coronavirus, influenza)." p. 1        | 73                        |
| "Aerosol-generating procedures (AGPs) are medical procedures that have been associated with an increased risk of transmission in healthcare settings." p. 4                                                                                                                        | 79                        |
| "Procedures highlighted as generating aerosols and with a documented increase of risk of transmission of pathogens." (translated) p. 8                                                                                                                                             | 82                        |
| "Aerosol generating procedures (AGPs) are defined as any medical and patient care procedure that results in the production of airborne particles (aerosols)." p. 3                                                                                                                 | 83                        |
| "AGMPs that generate small droplet nuclei in high concentration present a risk for airborne transmission of pathogens not otherwise able to spread by the airborne route (e.g., coronavirus, influenza)."                                                                          | 86                        |
| "An aerosol generating medical procedure (AGMP) is a medical or surgical procedure that involves manipulation of a patient's airway in a manner that may stimulate coughing and/or promote the generation of aerosols." p. 18                                                      | 87                        |
| "Any procedure carried out on a patient that can induce the production of aerosols as a result of manipulation of a person's airway." p. 9                                                                                                                                         | 88                        |
| "Aerosol-generating medical procedures are medical procedures that can generate aerosols as a result of artificial manipulation of a person's airway." p. 167                                                                                                                      | 89                        |
| "During AGPs there is an increased risk of aerosol spread of infectious agents irrespective of the mode of transmission (contact, droplet, or airborne), and airborne precautions must be implemented..." p. 1                                                                     | 91                        |
| "Aerosol generating medical procedures (AGMP) are any procedure carried out on a patient/resident/client that can induce the production of aerosols of various sizes, including droplet nuclei." p. 1                                                                              | 101                       |
| "Several medical procedures have been reported to generate aerosols and to increase the risk of pathogen transmission." p. 2                                                                                                                                                       | 102                       |
| "Any intervention performed on a patient, possibly generating aerosols of any dimension, including droplet nuclei." ("...toute intervention mène sur un patient pouvant entraîner la production d'aérosols de différentes dimensions, notamment des noyaux de gouttelettes.") p. 1 | 104                       |
| "Several medical procedures have been reported to generate aerosols and to increase the risk of pathogen transmission." p. 2                                                                                                                                                       | 112                       |

| <b>Aerosol-Generating Procedure Definition</b>                                                                                                                                                                     | <b>Reference # in Appendix 3</b> |
|--------------------------------------------------------------------------------------------------------------------------------------------------------------------------------------------------------------------|----------------------------------|
| "Procedures that are believed to generate aerosols and droplets as a source of respiratory pathogens..." p. 1                                                                                                      | 114                              |
| "Procedures that are believed to generate aerosols and droplets as a source of respiratory pathogens..." p. 3                                                                                                      | 115                              |
| "Procedures that may increase potential exposure to aerosol transmissible disease pathogens due to the reasonably anticipated aerosolization of pathogens." p. viii                                                | 116                              |
| "Aerosol generating medical procedures (AGMP) are any procedure carried out on a patient/resident/client <sup>1</sup> that can induce the production of aerosols of various sizes, including droplet nuclei." p. 1 | 117                              |
| "Certain medical interventions [...] may create localized aerosol generation that can allow airborne transmission to those closely involved in the procedure." p. 3                                                | 118                              |
| "Aerosol-generating medical procedures can generate aerosols as a result of artificial manipulation of a person's airway." p. 119                                                                                  | 119                              |
| "...any medical procedure that can induce the production of aerosols of various sizes, including droplet nuclei." p. 37                                                                                            | 120                              |
| "AGPs are procedures thought to generate respirable aerosols and have been associated with increased risk of occupationally acquired infection among healthcare personnel." p. 707                                 | 127                              |

## Appendix 6

### Aerosol-Generating Procedure Groups

| Line | Aerosol-Generating Procedure Group                                     | Frequency Count |
|------|------------------------------------------------------------------------|-----------------|
| 1    | intubation and extubation procedures                                   | 114             |
| 2    | airway suctioning                                                      | 92              |
| 3    | bronchoscopy                                                           | 89              |
| 4    | non-invasive ventilation                                               | 78              |
| 5    | nebulized or aerosol therapy                                           | 75              |
| 6    | cardiopulmonary resuscitation                                          | 66              |
| 7    | sputum induction                                                       | 60              |
| 8    | tracheostomy and tracheostomy procedures                               | 57              |
| 9    | manual ventilation                                                     | 52              |
| 10   | autopsy                                                                | 33              |
| 11   | high-flow oxygen therapy                                               | 32              |
| 12   | oral and dental procedures                                             | 31              |
| 13   | high-frequency oscillatory ventilation                                 | 27              |
| 14   | chest physiotherapy                                                    | 23              |
| 15   | surgery/post-mortem procedures with high-speed devices                 | 14              |
| 16   | nasopharyngeal aspirate                                                | 13              |
| 17   | nasopharyngoscopy or laryngoscopy                                      | 12              |
| 18   | breaking closed ventilation systems (intentionally or unintentionally) | 11              |
| 19   | coughing                                                               | 10              |
| 20   | nasopharyngeal and oropharyngeal swabbing                              | 9               |
| 21   | mechanical ventilation                                                 | 8               |
| 22   | handling soiled laundry                                                | 5               |
| 23   | manipulation of masks                                                  | 5               |
| 24   | upper GI endoscopy                                                     | 5               |
| 25   | lung function testing                                                  | 4               |
| 26   | nasogastric tube insertion                                             | 4               |
| 27   | prone positioning                                                      | 4               |
| 28   | thoracic surgery and procedures                                        | 4               |
| 29   | ENT and neurosurgery                                                   | 3               |
| 30   | mechanical insufflation and exsufflation                               | 3               |
| 31   | suction of body fluids (not further specified)                         | 3               |
| 32   | GI endoscopy (not further specified)                                   | 2               |
| 33   | intra/extra pulmonary high-frequency oscillation devices               | 2               |
| 34   | toilet use and flushing                                                | 2               |
| 35   | vacuum cleaning                                                        | 2               |
| 36   | colonoscopy                                                            | 1               |
| 37   | supraglottic airways                                                   | 1               |

## Appendix 7

### Aerosol-Generating Procedures List

| Aerosol-Generating Procedure                                                                                                                                                                                                                                                                     | Frequency Count | Reference # in Appendix 3                                                       |
|--------------------------------------------------------------------------------------------------------------------------------------------------------------------------------------------------------------------------------------------------------------------------------------------------|-----------------|---------------------------------------------------------------------------------|
| abscess/wound irrigation (non-respiratory TB)                                                                                                                                                                                                                                                    | 1               | 117                                                                             |
| accidental extubation and re-intubation                                                                                                                                                                                                                                                          | 1               | 98                                                                              |
| accidental extubation requiring immediate re-intubation                                                                                                                                                                                                                                          | 1               | 103                                                                             |
| activity at bed                                                                                                                                                                                                                                                                                  | 1               | 126                                                                             |
| administering aerosols                                                                                                                                                                                                                                                                           | 2               | 35, 39                                                                          |
| administration of aerosolized medication                                                                                                                                                                                                                                                         | 3               | 8, 10, 97                                                                       |
| administration of aerosolizing or nebulized medications, however: avoid the use of nebulizer if possible (use of alternatives such as meter-dose inhaler with spacer are preferable)                                                                                                             | 1               | 73                                                                              |
| administration of nebulized treatment                                                                                                                                                                                                                                                            | 2               | 30, 122                                                                         |
| administration of nebulizing medications, does not include administration of an MDI                                                                                                                                                                                                              | 1               | 101                                                                             |
| administration of oxygen                                                                                                                                                                                                                                                                         | 2               | 114, 115                                                                        |
| aerosol humidification                                                                                                                                                                                                                                                                           | 3               | 114, 115, 128                                                                   |
| aerosol inhalation                                                                                                                                                                                                                                                                               | 1               | 60                                                                              |
| aerosol medication                                                                                                                                                                                                                                                                               | 1               | 104                                                                             |
| aerosol therapies                                                                                                                                                                                                                                                                                | 2               | 53, 105                                                                         |
| aerosolized administration of pentamidine or other medications                                                                                                                                                                                                                                   | 1               | 116                                                                             |
| aerosolized or nebulized medication administration                                                                                                                                                                                                                                               | 4               | 18, 69, 117, 119                                                                |
| air turbines                                                                                                                                                                                                                                                                                     | 1               | 126                                                                             |
| air water syringes                                                                                                                                                                                                                                                                               | 1               | 126                                                                             |
| airway stabilization                                                                                                                                                                                                                                                                             | 1               | 103                                                                             |
| airway suction(ing)                                                                                                                                                                                                                                                                              | 4               | 18, 114, 115, 117                                                               |
| any diagnostic interventions that involve the use of video laryngoscopy that can result in airway irritation and coughing (e.g. direct visualisation during airway clearance techniques or when assisting speech and language therapists performing fiberoptic endoscopic evaluation of swallow) | 1               | 68                                                                              |
| any mobilisation or therapy that may result in coughing and expectoration of mucus                                                                                                                                                                                                               | 1               | 68                                                                              |
| artificial ventilation                                                                                                                                                                                                                                                                           | 1               | 106                                                                             |
| aspiration of respiratory airways secretion in an opened circuit in an intubated patient or a patient with a tracheotomy                                                                                                                                                                         | 1               | 19                                                                              |
| aspiration of respiratory tract                                                                                                                                                                                                                                                                  | 1               | 120                                                                             |
| autopsies involving respiratory tissues                                                                                                                                                                                                                                                          | 3               | 16, 73, 86                                                                      |
| autopsy                                                                                                                                                                                                                                                                                          | 20              | 2, 19, 23, 25, 27, 38, 47, 50, 62, 65, 76, 80, 81, 82, 87, 88, 93, 99, 119, 120 |
| autopsy examination                                                                                                                                                                                                                                                                              | 1               | 72                                                                              |

| <b>Aerosol-Generating Procedure</b>                                                                                                                               | <b>Frequency Count</b> | <b>Reference # in Appendix 3</b>                                                                                                                                                                                                                                                               |
|-------------------------------------------------------------------------------------------------------------------------------------------------------------------|------------------------|------------------------------------------------------------------------------------------------------------------------------------------------------------------------------------------------------------------------------------------------------------------------------------------------|
| autopsy of lung tissue                                                                                                                                            | 4                      | 6, 101, 117, 119                                                                                                                                                                                                                                                                               |
| autopsy procedures involving oscillating saws                                                                                                                     | 1                      | 102                                                                                                                                                                                                                                                                                            |
| autopsy, clinical, surgical and laboratory procedures that may aerosolize pathogens, such as operating bone saws, centrifuges, blenders, and aspiration equipment | 1                      | 116                                                                                                                                                                                                                                                                                            |
| awake tracheal intubation under fibroscopy                                                                                                                        | 1                      | 106                                                                                                                                                                                                                                                                                            |
| bag valve masks, includes where performed with ECT                                                                                                                | 1                      | 5                                                                                                                                                                                                                                                                                              |
| bag-valve mask ventilation                                                                                                                                        | 7                      | 20, 46, 114, 115, 117, 118, 128                                                                                                                                                                                                                                                                |
| bed making                                                                                                                                                        | 1                      | 126                                                                                                                                                                                                                                                                                            |
| bi-level positive airway pressure                                                                                                                                 | 8                      | 2, 5, 6, 7, 8, 10, 88, 104                                                                                                                                                                                                                                                                     |
| breaking closed ventilation systems intentionally (e.g. open suctioning) or unintentionally (e.g. patient movement)                                               | 2                      | 73, 117                                                                                                                                                                                                                                                                                        |
| breathing                                                                                                                                                         | 1                      | 59                                                                                                                                                                                                                                                                                             |
| bronchial challenge tests                                                                                                                                         | 1                      | 29                                                                                                                                                                                                                                                                                             |
| bronchial endoscopy                                                                                                                                               | 1                      | 109                                                                                                                                                                                                                                                                                            |
| bronchial suctioning                                                                                                                                              | 1                      | 30                                                                                                                                                                                                                                                                                             |
| bronchoalveolar lavage                                                                                                                                            | 1                      | 14                                                                                                                                                                                                                                                                                             |
| bronchoscopy                                                                                                                                                      | 70                     | 3, 4, 5, 6, 7, 8, 10, 11, 14, 17, 18, 19, 20, 21, 22, 23, 25, 26, 30, 31, 33, 34, 37, 38, 39, 43, 46, 48, 49, 50, 52, 57, 62, 64, 65, 67, 68, 69, 71, 74, 77, 78, 79, 80, 81, 82, 84, 85, 87, 88, 89, 93, 96, 97, 98, 99, 102, 104, 110, 111, 112, 116, 118, 119, 120, 122, 124, 126, 127, 128 |
| bronchoscopy (diagnostic or therapeutic)                                                                                                                          | 2                      | 47, 76                                                                                                                                                                                                                                                                                         |
| bronchoscopy and bronchoalveolar lavage                                                                                                                           | 8                      | 15, 16, 31, 73, 86, 90, 101, 117                                                                                                                                                                                                                                                               |
| bronchoscopy and upper ENT airway procedures that involve suctioning                                                                                              | 1                      | 90                                                                                                                                                                                                                                                                                             |
| bronchoscopy or other upper airway endoscopy                                                                                                                      | 3                      | 114, 115, 119                                                                                                                                                                                                                                                                                  |
| bronchoscopy with nebulized medication administration (NMA)                                                                                                       | 1                      | 75                                                                                                                                                                                                                                                                                             |
| BubblePEP                                                                                                                                                         | 1                      | 76                                                                                                                                                                                                                                                                                             |
| cardiopulmonary resuscitation                                                                                                                                     | 46                     | 2, 3, 6, 7, 8, 10, 11, 14, 15, 17, 19, 21, 22, 23, 25, 27, 30, 34, 37, 38, 46, 47, 49, 50, 52, 54, 62, 67, 71, 77, 78, 79, 81, 82, 85, 88, 89, 96, 98, 105, 116, 117, 119, 122, 124, 128                                                                                                       |
| cardiopulmonary resuscitation (CPR) with respiratory (bvm, intubation)                                                                                            | 1                      | 5                                                                                                                                                                                                                                                                                              |
| cardiopulmonary resuscitation (with manipulation of the airway)                                                                                                   | 1                      | 101                                                                                                                                                                                                                                                                                            |
| cardiopulmonary resuscitation during airway management                                                                                                            | 2                      | 76, 93                                                                                                                                                                                                                                                                                         |

| <b>Aerosol-Generating Procedure</b>                                         | <b>Frequency Count</b> | <b>Reference # in Appendix 3</b>    |
|-----------------------------------------------------------------------------|------------------------|-------------------------------------|
| cardiopulmonary resuscitation with bag valve mask ventilation               | 4                      | 16, 31, 73, 86                      |
| certain dental procedures                                                   | 1                      | 4                                   |
| chest compressions                                                          | 2                      | 114, 115                            |
| chest physiotherapy                                                         | 8                      | 21, 57, 69, 104, 114, 115, 119, 126 |
| chest physiotherapy (manual and mechanical cough assist device (MI-E))      | 1                      | 117                                 |
| chest tube or chest needle insertion                                        | 1                      | 21                                  |
| circumstances where emergent resuscitation efforts are anticipated          | 1                      | 119                                 |
| clapping                                                                    | 1                      | 49                                  |
| cleaning patients room                                                      | 1                      | 126                                 |
| cleaning the nebulizer                                                      | 1                      | 126                                 |
| cold-mist humidifier                                                        | 1                      | 126                                 |
| collection of induced sputum                                                | 1                      | 14                                  |
| collection of nasopharyngeal aspirate                                       | 1                      | 57                                  |
| collection of nasopharyngeal or throat swab specimens                       | 1                      | 113                                 |
| collection of sputum sample                                                 | 2                      | 114, 115                            |
| colonized tracheostomy                                                      | 1                      | 72                                  |
| colonoscopy                                                                 | 1                      | 126                                 |
| continuous positive airways pressure (CPAP)                                 | 1                      | 57                                  |
| cough - mechanical cough assist, mechanical insufflation exsufflation (MIE) | 1                      | 5                                   |
| cough after nebulization (toux induite apres nebulisation)                  | 1                      | 107                                 |
| cough generating procedures e.g. cough during treatment, huff               | 1                      | 76                                  |
| cough-inducing procedures                                                   | 1                      | 4                                   |
| coughing                                                                    | 4                      | 13, 56, 59, 110                     |
| CPR (pre intubation due to manual ventilation)                              | 1                      | 47                                  |
| CPR prior to intubation                                                     | 1                      | 111                                 |
| cutting/shaving frozen sections (cryostat)                                  | 1                      | 5                                   |
| deep tracheal suctioning                                                    | 1                      | 5                                   |
| defibrillation                                                              | 3                      | 114, 115, 126                       |
| dental amalgam removal                                                      | 1                      | 40                                  |
| dental care                                                                 | 3                      | 34, 35, 40                          |
| dental examinations                                                         | 1                      | 4                                   |
| dental procedures involving high-speed devices (e.g. high-speed drilling)   | 1                      | 43                                  |
| diagnostic bronchoscopy                                                     | 2                      | 72, 92                              |
| diagnostic sputum induction                                                 | 3                      | 18, 69, 119                         |
| disconnecting the patient from the ventilator                               | 3                      | 17, 30, 122                         |
| disconnection of endotracheal tube from ventilator                          | 1                      | 128                                 |
| drainage of peritonsillar abscess                                           | 1                      | 33                                  |
| drug nebulizer                                                              | 1                      | 100                                 |
| drugs round                                                                 | 1                      | 126                                 |

| <b>Aerosol-Generating Procedure</b>                                                                               | <b>Frequency Count</b> | <b>Reference # in Appendix 3</b>                                                               |
|-------------------------------------------------------------------------------------------------------------------|------------------------|------------------------------------------------------------------------------------------------|
| dysphagia assessment                                                                                              | 1                      | 17                                                                                             |
| endoscopic examination of the nose, sinuses, oropharynx, hypopharynx, and larynx                                  | 1                      | 33                                                                                             |
| endoscopy of the respiratory system                                                                               | 1                      | 105                                                                                            |
| endotracheal aspiration                                                                                           | 2                      | 114, 115                                                                                       |
| endotracheal extubation                                                                                           | 1                      | 50                                                                                             |
| endotracheal intubation                                                                                           | 22                     | 1, 18, 21, 30, 38, 47, 50, 51, 64, 69, 77, 88, 97, 101, 102, 104, 114, 115, 116, 117, 119, 122 |
| endotracheal intubation and its related procedures                                                                | 3                      | 25, 46, 78                                                                                     |
| endotracheal intubation, including during cardiopulmonary resuscitation                                           | 3                      | 76, 93, 99                                                                                     |
| endotracheal intubation/surgical airway                                                                           | 1                      | 118                                                                                            |
| endotracheal suction                                                                                              | 1                      | 35                                                                                             |
| evening meal                                                                                                      | 1                      | 126                                                                                            |
| exercise testing                                                                                                  | 1                      | 29                                                                                             |
| extractions                                                                                                       | 1                      | 61                                                                                             |
| extubation                                                                                                        | 19                     | 5, 6, 7, 17, 19, 33, 43, 46, 47, 73, 79, 85, 87, 90, 96, 101, 111, 117, 128                    |
| extubation and related procedures                                                                                 | 3                      | 26, 31, 68                                                                                     |
| facial mask conventional oxygen therapy (e.g. Ventimask)                                                          | 1                      | 23                                                                                             |
| first stage endodontic treatment                                                                                  | 1                      | 61                                                                                             |
| floor mopping                                                                                                     | 1                      | 126                                                                                            |
| foreign body management in the airway                                                                             | 1                      | 33                                                                                             |
| foreign body management in the nose                                                                               | 1                      | 33                                                                                             |
| front of neck airway procedures (insertion of tracheostomy, cricothyroidotomy)                                    | 1                      | 47                                                                                             |
| gastrointestinal endoscopy                                                                                        | 2                      | 33, 118                                                                                        |
| gastroscopy                                                                                                       | 1                      | 23                                                                                             |
| generated from human sources (e.g., during suctioning or wound irrigation)                                        | 1                      | 102                                                                                            |
| generated from human sources (expulsion from the respiratory tract during coughing, sneezing, talking or singing) | 1                      | 102                                                                                            |
| handling soiled laundry                                                                                           | 3                      | 42, 102, 108                                                                                   |
| handling waste                                                                                                    | 1                      | 108                                                                                            |
| heated high flow <6 LPM                                                                                           | 1                      | 5                                                                                              |
| high flow heated humidity oxygen therapy devices (ex. ARVO, Optiflow)                                             | 1                      | 11                                                                                             |
| high flow heated humidity oxygen therapy devices (ex. Optiflow)                                                   | 1                      | 8                                                                                              |
| high flow nasal cannula oxygen therapy (e.g. Optiflow)                                                            | 5                      | 8, 23, 46, 47, 79                                                                              |
| high pressure 3:1 air syringe                                                                                     | 1                      | 83                                                                                             |
| high speed hand pieces                                                                                            | 1                      | 126                                                                                            |



| <b>Aerosol-Generating Procedure</b>                                                                                                       | <b>Frequency Count</b> | <b>Reference # in Appendix 3</b>                                                                                                              |
|-------------------------------------------------------------------------------------------------------------------------------------------|------------------------|-----------------------------------------------------------------------------------------------------------------------------------------------|
| high-flow nasal oxygen                                                                                                                    | 8                      | 15, 17, 26, 41, 67, 68, 90, 111                                                                                                               |
| high-flow oxygen therapy                                                                                                                  | 11                     | 10, 21, 76, 77, 93, 99, 106, 114, 115, 117, 128                                                                                               |
| high-frequency oscillatory ventilation                                                                                                    | 27                     | 5, 6, 7, 8, 10, 11, 17, 18, 21, 26, 38, 43, 47, 49, 68, 69, 73, 79, 90, 97, 104, 114, 115, 117, 119, 125, 128                                 |
| humidification                                                                                                                            | 1                      | 57                                                                                                                                            |
| humidified high-flow oxygen systems                                                                                                       | 3                      | 5, 6, 2007                                                                                                                                    |
| hydraulic action in vertical soil stacks when toilets were flushed                                                                        | 1                      | 123                                                                                                                                           |
| incision draining of a dental abscess                                                                                                     | 1                      | 61                                                                                                                                            |
| induction of sputum                                                                                                                       | 9                      | 14, 17, 19, 26, 43, 68, 79, 90, 97                                                                                                            |
| insertion of nasogastric tube                                                                                                             | 3                      | 114, 115, 126                                                                                                                                 |
| inspiratory muscle training, particularly if used with patients who are ventilated and disconnection from a breathing circuit is required | 1                      | 76                                                                                                                                            |
| instillation                                                                                                                              | 1                      | 78                                                                                                                                            |
| intentional break in closed ventilation system (e.g., open suctioning)                                                                    | 1                      | 101                                                                                                                                           |
| intra/extra pulmonary high frequency oscillation devices (e.g. The Vest/MetaNeb/Percussionaire)                                           | 2                      | 68, 76                                                                                                                                        |
| intubation                                                                                                                                | 34                     | 2, 4, 10, 17, 22, 27, 33, 35, 39, 45, 48, 53, 54, 65, 70, 73, 74, 79, 80, 81, 84, 85, 87, 94, 98, 102, 103, 109, 110, 111, 120, 124, 125, 128 |
| intubation (in spontaneously breathing patients)                                                                                          | 1                      | 118                                                                                                                                           |
| intubation and extubation procedures                                                                                                      | 2                      | 16, 86                                                                                                                                        |
| intubation and mechanical ventilation                                                                                                     | 1                      | 111                                                                                                                                           |
| intubation and related procedures                                                                                                         | 19                     | 3, 5, 6, 7, 8, 11, 26, 31, 37, 43, 49, 62, 68, 71, 82, 88, 89, 90, 119                                                                        |
| intubation with neonates                                                                                                                  | 1                      | 5                                                                                                                                             |
| invasive sample collection procedures                                                                                                     | 1                      | 4                                                                                                                                             |
| invasive vascular procedures                                                                                                              | 1                      | 108                                                                                                                                           |
| laboratory handling of mycobacterium tuberculosis such as concentrating respiratory samples for smear and culture                         | 1                      | 72                                                                                                                                            |
| laryngoscopy                                                                                                                              | 4                      | 23, 73, 101, 117                                                                                                                              |
| laryngoscopy (with coughing patient)                                                                                                      | 1                      | 118                                                                                                                                           |
| laser plume                                                                                                                               | 1                      | 52                                                                                                                                            |
| laundry (e.g., bedding, towels and clothing) (only if shaken or handled in a manner that may aerosolize infectious particles)             | 1                      | 18                                                                                                                                            |
| laundry chutes                                                                                                                            | 1                      | 102                                                                                                                                           |

| <b>Aerosol-Generating Procedure</b>                                                                             | <b>Frequency Count</b> | <b>Reference # in Appendix 3</b>                                                                    |
|-----------------------------------------------------------------------------------------------------------------|------------------------|-----------------------------------------------------------------------------------------------------|
| lunch time                                                                                                      | 1                      | 126                                                                                                 |
| lung function tests (LFTs)                                                                                      | 1                      | 29                                                                                                  |
| lung testing (pulmonary function studies) with nebulized medication                                             | 1                      | 5                                                                                                   |
| lung tissue autopsy                                                                                             | 1                      | 104                                                                                                 |
| lung volume recruitment maneuvers (LVRM)                                                                        | 1                      | 5                                                                                                   |
| making beds                                                                                                     | 1                      | 42                                                                                                  |
| manipulation of BiPAP mask                                                                                      | 2                      | 114, 115                                                                                            |
| manipulation of medical devices                                                                                 | 1                      | 108                                                                                                 |
| manipulation of oxygen mask                                                                                     | 3                      | 114, 115, 126                                                                                       |
| manual bag mask ventilation                                                                                     | 1                      | 101                                                                                                 |
| manual hyperinflation (MHI)                                                                                     | 1                      | 76                                                                                                  |
| manual techniques (e.g. percussion/manual assisted cough) that may lead to coughing and expectoration of sputum | 1                      | 68                                                                                                  |
| manual ventilation                                                                                              | 26                     | 2, 3, 5, 6, 7, 8, 11, 17, 26, 27, 43, 45, 46, 47, 52, 67, 68, 71, 79, 88, 89, 90, 98, 114, 115, 119 |
| manual ventilation (intubation and related procedures)                                                          | 1                      | 62                                                                                                  |
| manual ventilation after intubation                                                                             | 2                      | 114, 115                                                                                            |
| manual ventilation before intubation                                                                            | 11                     | 1, 14, 15, 19, 23, 30, 24, 96, 114, 115, 122                                                        |
| mechanical insufflation- exsufflation (MI-E) devices                                                            | 1                      | 76                                                                                                  |
| mechanical insufflation-exsufflation (cough assist) devices                                                     | 1                      | 68                                                                                                  |
| mechanical ventilation                                                                                          | 2                      | 114, 115                                                                                            |
| mechanical ventilation circuit nebulizer                                                                        | 1                      | 107                                                                                                 |
| mechanical ventilation without HEPA filter on exhaust port                                                      | 1                      | 128                                                                                                 |
| mechanical ventilation, unfiltered air - open system                                                            | 1                      | 5                                                                                                   |
| mechanical ventilation/high frequency oscillatory ventilation                                                   | 1                      | 46                                                                                                  |
| medication administration via continuous nebulizer                                                              | 1                      | 79                                                                                                  |
| moving furniture                                                                                                | 1                      | 126                                                                                                 |
| mucosal surface endoscopic examinations of the head and neck                                                    | 1                      | 33                                                                                                  |
| nasal wash/aspirate                                                                                             | 1                      | 14                                                                                                  |
| nasogastric tube insertion                                                                                      | 1                      | 101                                                                                                 |
| nasopharyngeal aspirate                                                                                         | 3                      | 21, 74, 94                                                                                          |
| nasopharyngeal aspirates, washes, and scoping                                                                   | 5                      | 16, 31, 73, 86, 117                                                                                 |
| nasopharyngeal aspiration in children                                                                           | 2                      | 19, 23                                                                                              |
| nasopharyngeal or oropharyngeal suctioning                                                                      | 1                      | 76                                                                                                  |
| nasopharyngeal swab                                                                                             | 6                      | 14, 21, 35, 72, 74, 128                                                                             |
| nasopharyngeal washing and scoping                                                                              | 1                      | 101                                                                                                 |
| nasopharyngoscopy                                                                                               | 1                      | 11                                                                                                  |
| nasopharyngoscopy or flexible laryngoscopy procedures with high pressure irrigation or suction                  | 1                      | 5                                                                                                   |

| <b>Aerosol-Generating Procedure</b>                                      | <b>Frequency Count</b> | <b>Reference # in Appendix 3</b>                                                                |
|--------------------------------------------------------------------------|------------------------|-------------------------------------------------------------------------------------------------|
| nasotracheal or orotracheal suctioning                                   | 1                      | 128                                                                                             |
| nCPAP with bubble humidifier (humidificateur a bulles)                   | 1                      | 107                                                                                             |
| nebulization                                                             | 14                     | 14, 15, 22, 27, 28, 29, 58, 63, 67, 94, 103, 111, 118, 128                                      |
| nebulized medication administration                                      | 2                      | 55, 75                                                                                          |
| nebulized treatment/nebulizer therapy                                    | 24                     | 3, 8, 9, 11, 12, 16, 17, 21, 37, 38, 46, 49, 52, 62, 64, 71, 78, 86, 88, 89, 114, 115, 119, 125 |
| nebulized therapy for symptoms of respiratory infection                  | 1                      | 87                                                                                              |
| nebulized therapy/aerosolized medication administration                  | 5                      | 2, 5, 6, 7, 11                                                                                  |
| neonatal: CPAP in isolette                                               | 1                      | 5                                                                                               |
| non invasive ventilation (e.g. optiflow)                                 | 1                      | 19                                                                                              |
| non-invasive positive pressure ventilation                               | 11                     | 27, 30, 37, 38, 62, 69, 101, 119, 122, 125, 128                                                 |
| non-invasive positive pressure ventilation for acute respiratory failure | 3                      | 21, 76, 93                                                                                      |
| non-invasive tracheotomy                                                 | 1                      | 1                                                                                               |
| non-invasive ventilation                                                 | 16                     | 11, 14, 15, 34, 41, 57, 67, 85, 96, 103, 106, 111, 114, 115, 118, 126                           |
| non-invasive ventilation (BiPAP, CPAP, HFOV)                             | 1                      | 52                                                                                              |
| non-invasive ventilation (CPAP and BiPAP)                                | 16                     | 3, 16, 17, 26, 43, 45, 46, 47, 68, 71, 79, 86, 89, 90, 114, 118                                 |
| office-based nasal and laryngeal endoscopy                               | 1                      | 33                                                                                              |
| open airway suctioning                                                   | 6                      | 16, 47, 73, 76, 86, 93                                                                          |
| open artificial airway suctioning (i.e., ETT, tracheostomy)              | 1                      | 21                                                                                              |
| open endotracheal suctioning                                             | 15                     | 2, 3, 5, 6, 7, 8, 11, 27, 46, 48, 71, 88, 89, 99, 119                                           |
| open endotracheal suctioning (intubation and related procedures)         | 1                      | 62                                                                                              |
| open lung testing (pulmonary function studies) with open system          | 1                      | 5                                                                                               |
| open respiratory/airway suctioning                                       | 7                      | 5, 6, 7, 11, 87, 116, 125                                                                       |
| open suction tracheotomy                                                 | 1                      | 60                                                                                              |
| open suctioning                                                          | 9                      | 17, 26, 30, 43, 47, 68, 76, 79, 122                                                             |
| open suctioning (i.e. mouth or nose)                                     | 1                      | 21                                                                                              |
| open suctioning of respiratory tract                                     | 4                      | 31, 46, 90, 124                                                                                 |
| open suctioning of respiratory tract (including tracheostomy care)       | 1                      | 38                                                                                              |
| open thoracotomy                                                         | 2                      | 114, 115                                                                                        |
| open tracheal suctioning                                                 | 1                      | 10                                                                                              |
| open ventilation                                                         | 1                      | 70                                                                                              |
| open-circuit airway suctioning                                           | 1                      | 50                                                                                              |
| opening a ventilation circuit                                            | 1                      | 35                                                                                              |

| <b>Aerosol-Generating Procedure</b>                                                                                                                                                             | <b>Frequency Count</b> | <b>Reference # in Appendix 3</b> |
|-------------------------------------------------------------------------------------------------------------------------------------------------------------------------------------------------|------------------------|----------------------------------|
| optiflow                                                                                                                                                                                        | 1                      | 106                              |
| oral examination                                                                                                                                                                                | 1                      | 61                               |
| oro-tracheal suctioning                                                                                                                                                                         | 1                      | 20                               |
| oropharyngeal swab                                                                                                                                                                              | 2                      | 14, 35                           |
| other breaches to the integrity of a mechanical ventilation system (e.g., filter changes)                                                                                                       | 1                      | 21                               |
| oxygen therapy                                                                                                                                                                                  | 1                      | 111                              |
| oxylator                                                                                                                                                                                        | 1                      | 98                               |
| patient receiving oxygen through nasal cannula                                                                                                                                                  | 1                      | 95                               |
| patient with a forceful cough and is non-compliant with cough etiquette                                                                                                                         | 1                      | 119                              |
| pediatric nasopharyngeal suction                                                                                                                                                                | 1                      | 96                               |
| PEP and oscillating PEP devices                                                                                                                                                                 | 1                      | 76                               |
| placement of nasal packing                                                                                                                                                                      | 1                      | 33                               |
| polishing teeth                                                                                                                                                                                 | 1                      | 83                               |
| positioning/gravity assisted drainage techniques and manual techniques (e.g. expiratory vibrations, percussion, manual assisted cough) that may trigger a cough and the expectoration of sputum | 1                      | 76                               |
| positive pressure non-invasive ventilation                                                                                                                                                      | 1                      | 78                               |
| positive pressure non-invasive ventilation for acute respiratory insufficiency (spontaneous ventilation with continuing positive pressure, BPAP 3-5)                                            | 1                      | 99                               |
| positive pressure non-invasive ventilation with a facial mask (e.g. bi-level positive airway pressure [BiPAP] and continuous positive airway pressure [CPAP])                                   | 7                      | 18, 19, 23, 49, 96, 97, 115      |
| positive pressure ventilation                                                                                                                                                                   | 4                      | 51, 65, 114, 117                 |
| positive pressure ventilation for acute respiratory insufficiency (CPAP, BiPAP)                                                                                                                 | 1                      | 77                               |
| positive pressure ventilation such as continuous positive airway pressure (CPAP) or bilevel positive airway pressure (BiPAP), high flow nasal oxygen therapy                                    | 1                      | 73                               |
| positive pressure ventilation with inadequate seal                                                                                                                                              | 1                      | 47                               |
| post-mortem procedure using a high speed device                                                                                                                                                 | 1                      | 49                               |
| powered instrumentation in mucosal head and neck surgery                                                                                                                                        | 1                      | 33                               |
| procedure where a single-use catheter inserted into the ETT either by disconnecting the ventilator tubing or via a swivel connector                                                             | 1                      | 47                               |
| prone positioning                                                                                                                                                                               | 2                      | 30, 111                          |
| pulmonary function testing                                                                                                                                                                      | 1                      | 116                              |
| recruitment maneuvers                                                                                                                                                                           | 1                      | 111                              |
| respiratory and airway suctioning                                                                                                                                                               | 6                      | 8, 20, 69, 94, 112, 119          |
| respiratory assistance during CPR                                                                                                                                                               | 1                      | 99                               |
| respiratory physiotherapy                                                                                                                                                                       | 2                      | 34, 105                          |
| respiratory therapy                                                                                                                                                                             | 1                      | 35                               |
| respiratory tract drainage                                                                                                                                                                      | 1                      | 104                              |

| <b>Aerosol-Generating Procedure</b>                                                                                                                                                                                                            | <b>Frequency Count</b> | <b>Reference # in Appendix 3</b>                                                                                                                           |
|------------------------------------------------------------------------------------------------------------------------------------------------------------------------------------------------------------------------------------------------|------------------------|------------------------------------------------------------------------------------------------------------------------------------------------------------|
| resuscitation                                                                                                                                                                                                                                  | 3                      | 51, 84, 120                                                                                                                                                |
| routine patient care (patient breathing on their own with healthcare professionals present)                                                                                                                                                    | 1                      | 24                                                                                                                                                         |
| saline instillation via an open circuit/endotracheal tube                                                                                                                                                                                      | 1                      | 76                                                                                                                                                         |
| sampling activities done to test surfaces, items, and air for the virus                                                                                                                                                                        | 1                      | 95                                                                                                                                                         |
| shower                                                                                                                                                                                                                                         | 1                      | 126                                                                                                                                                        |
| sneezing                                                                                                                                                                                                                                       | 3                      | 13, 59, 110                                                                                                                                                |
| some dental procedures (e.g. high speed drilling)                                                                                                                                                                                              | 6                      | 17, 26, 68, 79, 90, 101                                                                                                                                    |
| some routine patient care with ventilated patients if there is excessive risk of unintentional breaks in closed ventilation system (e.g., turning patient, proning patient, caring for agitated/restless patient, oral care in awake patients) | 1                      | 101                                                                                                                                                        |
| speaking                                                                                                                                                                                                                                       | 2                      | 13, 59                                                                                                                                                     |
| sputum (not induced sputum)                                                                                                                                                                                                                    | 1                      | 14                                                                                                                                                         |
| sputum induction                                                                                                                                                                                                                               | 39                     | 2, 3, 5, 6, 7, 8, 10, 11, 16, 21, 23, 27, 30, 37, 38, 39, 46, 49, 52, 62, 65, 67, 71, 72, 73, 77, 78, 86, 87, 88, 89, 92, 96, 104, 114, 115, 116, 117, 119 |
| sputum induction (diagnostic or therapeutic)                                                                                                                                                                                                   | 4                      | 47, 76, 93, 99                                                                                                                                             |
| sputum induction using hypertonic saline                                                                                                                                                                                                       | 1                      | 101                                                                                                                                                        |
| sputum samples                                                                                                                                                                                                                                 | 1                      | 111                                                                                                                                                        |
| stabilization (not further specified)                                                                                                                                                                                                          | 1                      | 98                                                                                                                                                         |
| suction                                                                                                                                                                                                                                        | 9                      | 22, 52, 54, 57, 65, 78, 84, 102, 111                                                                                                                       |
| suction (in certain circumstances)                                                                                                                                                                                                             | 1                      | 64                                                                                                                                                         |
| suction after tracheal nursing                                                                                                                                                                                                                 | 1                      | 60                                                                                                                                                         |
| suction before and after intubation                                                                                                                                                                                                            | 3                      | 114, 115, 126                                                                                                                                              |
| suction in an open circuit for a patient with intubation or tracheotomy                                                                                                                                                                        | 1                      | 96                                                                                                                                                         |
| suction of airway secretions in a non-closed circuit, in an intubated patient                                                                                                                                                                  | 1                      | 49                                                                                                                                                         |
| suction of airway secretions in an opened circuit in an intubated or tracheotomized patient                                                                                                                                                    | 1                      | 23                                                                                                                                                         |
| suction of body fluid                                                                                                                                                                                                                          | 2                      | 114, 115                                                                                                                                                   |
| suction of respiratory secretions in an open circuit                                                                                                                                                                                           | 1                      | 85                                                                                                                                                         |
| suction of the respiratory tract (tracheotomy)                                                                                                                                                                                                 | 1                      | 77                                                                                                                                                         |
| suctioning of the respiratory tract                                                                                                                                                                                                            | 2                      | 31, 80                                                                                                                                                     |
| supraglottic airways (i.e., LMA, King LT, iGel used pre-hospital)                                                                                                                                                                              | 1                      | 5                                                                                                                                                          |
| surgery                                                                                                                                                                                                                                        | 5                      | 2, 25, 27, 52, 88                                                                                                                                          |
| surgery and post-mortem procedures involving high-speed devices                                                                                                                                                                                | 6                      | 17, 26, 43, 68, 79, 90                                                                                                                                     |
| surgery using a high speed device                                                                                                                                                                                                              | 3                      | 49, 81, 82                                                                                                                                                 |
| surgical airway                                                                                                                                                                                                                                | 1                      | 128                                                                                                                                                        |
| surgical tracheostomy                                                                                                                                                                                                                          | 1                      | 115                                                                                                                                                        |

| <b>Aerosol-Generating Procedure</b>                                                             | <b>Frequency Count</b> | <b>Reference # in Appendix 3</b>                           |
|-------------------------------------------------------------------------------------------------|------------------------|------------------------------------------------------------|
| tea trolley round                                                                               | 1                      | 126                                                        |
| three in one syringes                                                                           | 1                      | 126                                                        |
| toilet use                                                                                      | 1                      | 126                                                        |
| tracheal intubation                                                                             | 14                     | 14, 15, 19, 20, 30, 34, 52, 57, 67, 96, 114, 115, 121, 126 |
| tracheal intubation and extubation                                                              | 1                      | 23                                                         |
| tracheostomy                                                                                    | 10                     | 30, 33, 34, 45, 67, 73, 111, 114, 115, 122                 |
| tracheostomy and tracheostomy procedures                                                        | 1                      | 17                                                         |
| tracheostomy care                                                                               | 12                     | 5, 6, 7, 8, 10, 11, 33, 69, 104, 116, 117, 119             |
| tracheostomy care if requiring deep suctioning                                                  | 1                      | 101                                                        |
| tracheostomy insertion, changing and/or care                                                    | 1                      | 21                                                         |
| tracheostomy procedures                                                                         | 2                      | 88, 101                                                    |
| tracheotomy                                                                                     | 2                      | 14, 15                                                     |
| tracheotomy and tracheotomy care                                                                | 3                      | 19, 23, 96                                                 |
| tracheotomy care                                                                                | 1                      | 49                                                         |
| tracheotomy/tracheostomy procedures                                                             | 5                      | 26, 43, 68, 79, 90                                         |
| transesophageal echocardiography                                                                | 1                      | 101                                                        |
| transsphenoidal surgery                                                                         | 1                      | 5                                                          |
| tube or needle thoracostomy                                                                     | 1                      | 119                                                        |
| turning the patient to prone position                                                           | 2                      | 17, 122                                                    |
| ultrasonic scalers                                                                              | 1                      | 126                                                        |
| upper ENT airway procedures that involve suctioning                                             | 1                      | 17                                                         |
| upper gastro-intestinal endoscopy where there is open suctioning of the upper respiratory tract | 2                      | 17, 90                                                     |
| upper GI endoscopic procedures                                                                  | 1                      | 101                                                        |
| use of an air/water syringe during dental procedure                                             | 1                      | 50                                                         |
| use of cavitron, piezosonic or other mechanised scalers                                         | 1                      | 83                                                         |
| use of high flow oxygen (>6 L/min)                                                              | 1                      | 57                                                         |
| use of high speed handpieces for routine restorative procedures                                 | 1                      | 83                                                         |
| use of nebulisers                                                                               | 1                      | 57                                                         |
| use of oscillating saws                                                                         | 1                      | 18                                                         |
| use of positive pressure breathing devices (e.g. IPPB)                                          | 2                      | 68, 76                                                     |
| use of power tools (dental context)                                                             | 1                      | 61                                                         |
| use of propellant anesthetic freezing sprays such as oral lidocaine                             | 1                      | 5                                                          |
| use of scopes (dental context)                                                                  | 1                      | 61                                                         |
| use of ultrasound descaler (dental procedure)                                                   | 1                      | 50                                                         |
| using a vacuum cleaner                                                                          | 2                      | 42, 126                                                    |
| using dental drills                                                                             | 1                      | 50                                                         |
| ventilation (not further specified)                                                             | 1                      | 78                                                         |

| <b>Aerosol-Generating Procedure</b> | <b>Frequency Count</b> | <b>Reference # in Appendix 3</b> |
|-------------------------------------|------------------------|----------------------------------|
| ventilation via Combitube           | 1                      | 98                               |
| ward rounds                         | 1                      | 126                              |
| washing the patient                 | 1                      | 126                              |

## Appendix 8

### Possibly Aerosol-Generating Procedure Groups

| Possibly Aerosol-Generating Procedure Groups                           | Frequency Count |
|------------------------------------------------------------------------|-----------------|
| chest physiotherapy                                                    | 14              |
| nasopharyngeal aspirate                                                | 12              |
| nasopharyngeal and oropharyngeal swabbing                              | 10              |
| high-frequency oscillatory ventilation                                 | 9               |
| nebulized or aerosol therapy                                           | 9               |
| non-invasive ventilation                                               | 8               |
| tracheostomy and tracheostomy procedures                               | 8               |
| airway suctioning                                                      | 6               |
| coughing                                                               | 5               |
| intubation and extubation procedures                                   | 5               |
| high-flow oxygen therapy                                               | 4               |
| mechanical ventilation                                                 | 4               |
| cardiopulmonary resuscitation                                          | 3               |
| breaking closed ventilation systems (intentionally or unintentionally) | 2               |
| bronchoscopy                                                           | 2               |
| lung function testing                                                  | 2               |
| manual ventilation                                                     | 2               |
| nasopharyngoscopy or laryngoscopy                                      | 2               |
| sputum induction                                                       | 2               |
| suction of body fluids (not further specified)                         | 2               |
| thoracic surgery and procedures                                        | 2               |
| upper GI endoscopy                                                     | 2               |
| intra/extra pulmonary high-frequency oscillation devices               | 1               |
| mechanical insufflation and exsufflation                               | 1               |
| nasogastric tube insertion                                             | 1               |



## Appendix 9

### Possibly Aerosol-Generating Procedures List

| Possibly Aerosol-Generating Procedures                                                                                                                             | Frequency Count | Reference # in Appendix 3 |
|--------------------------------------------------------------------------------------------------------------------------------------------------------------------|-----------------|---------------------------|
| administration of intravenous resuscitation drugs                                                                                                                  | 1               | 118                       |
| administration of medication via nebulization                                                                                                                      | 2               | 26, 68                    |
| administration of pressurized humidified oxygen                                                                                                                    | 2               | 26, 68                    |
| aerosol humidity (not further specified)                                                                                                                           | 1               | 69                        |
| any mobilization or therapy that may result in coughing and expectoration of mucus                                                                                 | 1               | 111                       |
| artificial ventilation                                                                                                                                             | 1               | 1                         |
| bag-valve ventilation                                                                                                                                              | 1               | 69                        |
| bi-level positive pressure ventilation                                                                                                                             | 1               | 82                        |
| bronchoalveolar lavage                                                                                                                                             | 1               | 14                        |
| bronchoscopy                                                                                                                                                       | 1               | 55                        |
| BubblePEP                                                                                                                                                          | 1               | 111                       |
| cardiopulmonary resuscitation (CPR), chest compressions alone                                                                                                      | 1               | 5                         |
| chest drain insertion                                                                                                                                              | 1               | 77                        |
| chest physiotherapy                                                                                                                                                | 7               | 1, 3, 62, 71, 88, 89, 112 |
| chest physiotherapy in absence of other AGPs                                                                                                                       | 1               | 47                        |
| circuit changes                                                                                                                                                    | 1               | 69                        |
| clinical dysphagia examinations-this examination includes orofacial assessment and administration of food and/or fluids to evaluate swallowing ability             | 1               | 47                        |
| closed suction systems (CSS) enable patients to be suctioned by a suction catheter enclosed within a plastic sleeve, without the need for ventilator disconnection | 1               | 47                        |
| closed suction tracheotomy                                                                                                                                         | 1               | 60                        |
| collecting a nasopharyngeal swab                                                                                                                                   | 1               | 47                        |
| cough generating procedures (e.g., cough during treatment, huff)                                                                                                   | 1               | 111                       |
| cough induction                                                                                                                                                    | 1               | 71                        |
| CPR, as it can include a number of different procedures, some of which are AGPs                                                                                    | 1               | 43                        |
| defibrillation, cardioversion, transcutaneous pacing                                                                                                               | 1               | 118                       |
| delivery of nebulized medications via simple face mask                                                                                                             | 1               | 47                        |
| disruption of a mechanical ventilation system (filter change)                                                                                                      | 1               | 77                        |

| Possibly Aerosol-Generating Procedures                                                                                                    | Frequency Count | Reference # in Appendix 3    |
|-------------------------------------------------------------------------------------------------------------------------------------------|-----------------|------------------------------|
| endotracheal suction                                                                                                                      | 1               | 1                            |
| extubation                                                                                                                                | 3               | 24, 55, 69                   |
| fibreoptic endoscopic evaluation of swallowing (FEES)                                                                                     | 1               | 47                           |
| heat and moisture exchange HME (F) changes                                                                                                | 1               | 69                           |
| high flow nasal cannula                                                                                                                   | 1               | 118                          |
| high flow oxygen                                                                                                                          | 1               | 38                           |
| high flow oxygen therapy                                                                                                                  | 2               | 1, 47                        |
| high-frequency oscillation (HFOV)                                                                                                         | 1               | 77                           |
| high-frequency oscillatory ventilation                                                                                                    | 8               | 1, 3, 25, 62, 71, 82, 88, 89 |
| in-tube infusion or spray humidification to humidify the trachea                                                                          | 1               | 60                           |
| induced sputum                                                                                                                            | 1               | 14                           |
| insertion of a nasogastric tube                                                                                                           | 1               | 47                           |
| inspiratory muscle training, particularly if used with patients who are ventilated and disconnection from a breathing circuit is required | 1               | 111                          |
| intra/extra pulmonary high-frequency oscillation devices (e.g. The Vest, MetaNeb, Percussionaire)                                         | 1               | 111                          |
| intubation                                                                                                                                | 1               | 98                           |
| laparoscopic surgery                                                                                                                      | 1               | 33                           |
| laryngoscopy                                                                                                                              | 1               | 47                           |
| lung function testing                                                                                                                     | 1               | 13                           |
| manual hyperinflation                                                                                                                     | 1               | 111                          |
| manual ventilation before intubation                                                                                                      | 1               | 121                          |
| mechanical insufflation- exsufflation (MI-E) devices                                                                                      | 1               | 111                          |
| mechanical ventilation                                                                                                                    | 1               | 55                           |
| nasal wash/aspirate                                                                                                                       | 1               | 14                           |
| naso-pharyngeal aspiration or sampling                                                                                                    | 1               | 77                           |
| nasopharyngeal aspirates                                                                                                                  | 3               | 71, 88, 89                   |
| nasopharyngeal aspiration (NPA)                                                                                                           | 1               | 38                           |
| nasopharyngeal or oropharyngeal suctioning                                                                                                | 1               | 111                          |
| nasopharyngeal suction                                                                                                                    | 1               | 49                           |
| nasopharyngeal swab                                                                                                                       | 5               | 3, 14, 71, 88, 89            |
| nebulization                                                                                                                              | 3               | 25, 41, 82                   |
| nebulization therapy                                                                                                                      | 1               | 77                           |

| Possibly Aerosol-Generating Procedures                                                                                                                                                            | Frequency Count | Reference # in Appendix 3 |
|---------------------------------------------------------------------------------------------------------------------------------------------------------------------------------------------------|-----------------|---------------------------|
| non-invasive positive pressure ventilation                                                                                                                                                        | 2               | 25, 82                    |
| non-invasive positive pressure ventilation for acute respiratory failure (CPAP, BiPAP3-5)                                                                                                         | 1               | 47                        |
| non-invasive ventilation                                                                                                                                                                          | 2               | 55, 121                   |
| obtaining intravenous or intraosseous access                                                                                                                                                      | 1               | 118                       |
| obtaining nasopharyngeal aspirates                                                                                                                                                                | 2               | 62, 119                   |
| obtaining nasopharyngeal swabs                                                                                                                                                                    | 2               | 62, 119                   |
| open suction                                                                                                                                                                                      | 1               | 111                       |
| opened aspiration (mouth or nose)                                                                                                                                                                 | 1               | 77                        |
| oropharyngeal swab                                                                                                                                                                                | 1               | 14                        |
| oxygen therapy (administration of oxygen)                                                                                                                                                         | 1               | 1                         |
| patients on oxygen concentrations of 50% or higher                                                                                                                                                | 1               | 69                        |
| PEP and oscillating PEP devices                                                                                                                                                                   | 1               | 111                       |
| positioning / gravity assisted drainage techniques and manual techniques (e.g. expiratory vibrations, percussion, manual assisted cough) that may trigger a cough and the expectoration of sputum | 1               | 111                       |
| respiratory physiotherapy                                                                                                                                                                         | 1               | 77                        |
| rhinopharyngeal suction                                                                                                                                                                           | 1               | 3                         |
| saline instillation via an open circuit endotracheal tube                                                                                                                                         | 1               | 111                       |
| soft-tissue surgery as long as the blood is not aerosolized by the use of energy devices                                                                                                          | 1               | 33                        |
| spirometry & pulmonary function tests (PFTs)                                                                                                                                                      | 1               | 69                        |
| sputum (not induced)                                                                                                                                                                              | 1               | 14                        |
| sputum inductions                                                                                                                                                                                 | 1               | 111                       |
| suction before tracheal nursing                                                                                                                                                                   | 1               | 60                        |
| suction of body fluid                                                                                                                                                                             | 1               | 1                         |
| suctioning                                                                                                                                                                                        | 1               | 24                        |
| suctioning (open or tracheostomy)                                                                                                                                                                 | 1               | 55                        |
| swabbing the oropharynx or nasopharynx                                                                                                                                                            | 1               | 47                        |
| tracheostomy care                                                                                                                                                                                 | 5               | 3, 62, 71, 88, 89         |
| tracheotomy                                                                                                                                                                                       | 1               | 121                       |
| tracheotomy care, insertion and change                                                                                                                                                            | 1               | 77                        |
| transesophageal echo                                                                                                                                                                              | 1               | 47                        |
| tube or needle thoracostomy                                                                                                                                                                       | 1               | 69                        |
| upper GI endoscopy                                                                                                                                                                                | 1               | 47                        |

| <b>Possibly Aerosol-Generating Procedures</b>             | <b>Frequency Count</b> | <b>Reference # in Appendix 3</b> |
|-----------------------------------------------------------|------------------------|----------------------------------|
| use of a mechanical ventilator                            | 1                      | 24                               |
| use of an incentive spirometer                            | 1                      | 24                               |
| use of nebulizers                                         | 1                      | 56                               |
| use of positive pressure breathing devices (e.g. IPPB)    | 1                      | 111                              |
| using topical lidocaine for intubation                    | 1                      | 98                               |
| vomiting                                                  | 1                      | 102                              |
| water used for the humidifier in nasal CPAP by convection | 1                      | 107                              |

## Appendix 10

### Not Aerosol-Generating Procedure Groups

| Not Aerosol-Generating Procedure Groups        | Frequency Count |
|------------------------------------------------|-----------------|
| nasopharyngeal and oropharyngeal swabbing      | 15              |
| chest physiotherapy                            | 9               |
| oral and dental procedures                     | 9               |
| thoracic surgery and procedures                | 8               |
| nebulized or aerosol therapy                   | 7               |
| airway suctioning                              | 5               |
| cardiopulmonary resuscitation                  | 5               |
| nasogastric tube insertion                     | 4               |
| nasopharyngeal aspirate                        | 4               |
| bronchoscopy                                   | 3               |
| coughing                                       | 3               |
| high-frequency oscillatory ventilation         | 3               |
| manipulation of masks                          | 3               |
| mechanical ventilation                         | 3               |
| non-invasive ventilation                       | 3               |
| upper GI endoscopy                             | 3               |
| manual ventilation                             | 2               |
| nasopharyngoscopy or laryngoscopy              | 2               |
| Nitrous Oxide (Entonox®) administration        | 2               |
| sputum induction                               | 2               |
| colonoscopy                                    | 1               |
| handling soiled laundry                        | 1               |
| high-flow oxygen therapy                       | 1               |
| labour and delivery                            | 1               |
| lung function testing                          | 1               |
| prone positioning                              | 1               |
| suction of body fluids (not further specified) | 1               |

## Appendix 11

### Not Aerosol-Generating Procedures List

| <b>Not Aerosol-Generating Procedures</b>                                                   | <b>Frequency Count</b> | <b>Reference # in Appendix 3</b> |
|--------------------------------------------------------------------------------------------|------------------------|----------------------------------|
| adjustment of a bi-level positive pressure ventilation machine                             | 1                      | 1                                |
| administration of oxygen                                                                   | 1                      | 121                              |
| administration of pressurized humidified oxygen                                            | 1                      | 90                               |
| assessments and examinations (routine patient care that does not involve patient movement) | 1                      | 101                              |
| bronchial artery embolization - open procedure, not bronchoscopy                           | 1                      | 5                                |
| bronchoscopy                                                                               | 2                      | 1, 121                           |
| bronchoscopy without nebulized medication administration                                   | 1                      | 75                               |
| changing bed linens                                                                        | 1                      | 75                               |
| chest compressions                                                                         | 2                      | 1, 121                           |
| chest compressions and defibrillation (as part of resuscitation)                           | 1                      | 90                               |
| chest physiotherapy                                                                        | 6                      | 5, 6, 7, 43, 45, 121             |
| chest tube for pneumothorax                                                                | 1                      | 5                                |
| collection of nasopharyngeal aspirates                                                     | 1                      | 101                              |
| collection of nasopharyngeal swabs                                                         | 1                      | 101                              |
| collection of sputum sample                                                                | 1                      | 121                              |
| cough - manual cough assist (not induced sputum)                                           | 1                      | 5                                |
| cough from a trach                                                                         | 1                      | 5                                |
| coughing induced after nebulization                                                        | 1                      | 107                              |
| CPAP with bubble humidifier                                                                | 1                      | 107                              |
| defibrillation                                                                             | 2                      | 1, 121                           |
| dry oxygen via non-rebreather mask with reservoir                                          | 1                      | 5                                |
| endotracheal aspiration                                                                    | 1                      | 121                              |
| Entonox® - administration of nitrous oxide                                                 | 1                      | 5                                |
| Entonox® [nitrous oxide] or medication via nebulization                                    | 1                      | 90                               |
| examinations (dental context)                                                              | 1                      | 83                               |
| flushing liquid waste                                                                      | 1                      | 75                               |
| gastro-jejunostomy tube placement                                                          | 1                      | 5                                |
| gastrostomy                                                                                | 1                      | 5                                |

|                                                                                                       |   |                              |
|-------------------------------------------------------------------------------------------------------|---|------------------------------|
| hand scaling with suction                                                                             | 1 | 83                           |
| high- frequency oscillatory ventilation (adult)                                                       | 1 | 19                           |
| high-flow oxygen                                                                                      | 1 | 121                          |
| high-frequency oscillatory ventilation                                                                | 2 | 23, 121                      |
| hyperbaric therapy                                                                                    | 1 | 5                            |
| incentive spirometry                                                                                  | 1 | 5                            |
| insertion of nasogastric tube                                                                         | 1 | 121                          |
| intranasal narcain administration (if no bvm)                                                         | 1 | 5                            |
| IV pump check (routine patient care that does not involve patient movement)                           | 1 | 101                          |
| jejunostomy                                                                                           | 1 | 5                            |
| labour & delivery                                                                                     | 1 | 5                            |
| low flow dry oxygen systems (e.g., nasal prongs or masks)                                             | 1 | 5                            |
| lower GI endoscopy                                                                                    | 1 | 47                           |
| lung ablation - open procedure, not via bronchoscopy                                                  | 1 | 5                            |
| lung biopsy                                                                                           | 1 | 5                            |
| lung testing (pulmonary function studies) - closed system                                             | 1 | 5                            |
| manipulation of bilevel positive airway pressure mask                                                 | 1 | 121                          |
| manipulation of oxygen mask                                                                           | 2 | 1, 121                       |
| manual ventilation after intubation                                                                   | 2 | 1, 121                       |
| mechanical ventilation                                                                                | 1 | 121                          |
| mechanical ventilation circuit nebulizer                                                              | 1 | 107                          |
| mechanical ventilation using physical proning - closed system                                         | 1 | 5                            |
| mechanical ventilation, filtered air - closed system                                                  | 1 | 5                            |
| medication administration and titration (routine patient care that does not involve patient movement) | 1 | 101                          |
| nasoendoscopic procedures Including fiberoptic endoscopic evaluation (FEE) of swallowing              | 1 | 5                            |
| nasogastric intubation                                                                                | 1 | 1                            |
| nasogastric tube insertion in children less than 1 year of age                                        | 1 | 101                          |
| nasopharyngeal aspirate                                                                               | 3 | 5, 6, 7                      |
| nasopharyngeal swab                                                                                   | 8 | 5, 7, 16, 24, 27, 49, 66, 99 |
| nasopharyngeal and throat swabs                                                                       | 1 | 16                           |
| nasopharyngeal sampling                                                                               | 1 | 32                           |
| nasopharyngeal swab (adults)                                                                          | 1 | 19                           |

|                                                                                                                                                          |   |            |
|----------------------------------------------------------------------------------------------------------------------------------------------------------|---|------------|
| nasopharyngoscopy or flexible laryngoscopy procedures - without high pressure irrigation or suction                                                      | 1 | 5          |
| nebulization                                                                                                                                             | 3 | 43, 45, 90 |
| nebulization therapy                                                                                                                                     | 2 | 1, 23      |
| nebulization therapy (adult and children)                                                                                                                | 1 | 19         |
| nebulizer treatment                                                                                                                                      | 1 | 121        |
| NG & NJ tube placement                                                                                                                                   | 1 | 5          |
| non-invasive ventilation                                                                                                                                 | 1 | 75         |
| non-surgical extractions                                                                                                                                 | 1 | 83         |
| oral suctioning                                                                                                                                          | 2 | 6, 7       |
| oral suctioning or suctioning of the oropharynx                                                                                                          | 1 | 5          |
| orogastric tube placement                                                                                                                                | 1 | 5          |
| oxygen delivered via nasal prongs and/or non-rebreathe masks regardless of flow rate                                                                     | 1 | 101        |
| patient bathing                                                                                                                                          | 1 | 75         |
| pediatric chest tube placement                                                                                                                           | 1 | 5          |
| phlebotomy                                                                                                                                               | 1 | 5          |
| pleural drains                                                                                                                                           | 1 | 5          |
| pleurex insertions, removals, & drainage procedures                                                                                                      | 1 | 5          |
| postural drainage with percussion (adult and children)                                                                                                   | 1 | 19         |
| postural drainage with percussion (clapping)                                                                                                             | 1 | 23         |
| pouring liquids into a hopper                                                                                                                            | 1 | 75         |
| removable denture stages                                                                                                                                 | 1 | 83         |
| removal of caries using hand excavation or slow speed handpiece                                                                                          | 1 | 83         |
| routine patient care that does not involve patient movement (e.g., IV pump check, medication administration and titration, assessments and examinations) | 1 | 101        |
| sputum collection                                                                                                                                        | 1 | 1          |
| suction after intubation                                                                                                                                 | 2 | 1, 121     |
| suction before intubation                                                                                                                                | 2 | 1, 121     |
| suction of body fluid                                                                                                                                    | 1 | 121        |
| taking a nasopharyngeal or a throat swab for a patient being treated in the community                                                                    | 1 | 67         |
| thoracentesis                                                                                                                                            | 1 | 5          |
| throat swab                                                                                                                                              | 2 | 99, 124    |
| transesophageal echocardiography (TEE)                                                                                                                   | 1 | 5          |
| video fluorographic swallowing study (VFSS)                                                                                                              | 1 | 5          |



## Appendix 12

### Categorization Challenges

In Judson and Munster (all references in Appendix 3), Siegel et al., and Prince Edward Island Department of Health, the procedure in question is listed plainly as "suctioning," but the context in each paper is discussing production of respiratory droplets, production of aerosols from the respiratory tract, or influenza droplets, respectively.<sup>52, 84, 102</sup> These context clues suggest that the suctioning, as presented in the aforementioned papers, can appropriately be categorized under "airway suctioning." While these situations have clear indications in the surrounding text as to how to categorize the procedure, other situations are not so easily interpreted. Often "suctioning" or similar variants, were part of a longer list of procedures, but because of the other procedures with which it was listed, we decided to include it as "airway suctioning." An example of this can be found where Bolton et al. list "open suctioning" after "intubation and extubation" and "manual ventilation" and before "tracheostomy and tracheostomy procedures."<sup>17</sup> In this case, the procedure was listed among other respiratory procedures, and so we inferred that open suctioning should also be classified as "airway suctioning." In another situation, Ministère de la Santé et des Soins de longue durée listed "suction" before "intubation," but after "autopsy," and here we could not comfortably assume that "suction" would be limited to airway suctioning.<sup>65</sup> Finally, where authors listed "suction of body fluids" as a procedure, as in two publications by Tran et al.,<sup>114, 115</sup> World Health Organization,<sup>121</sup> and Agence canadienne des médicaments et des technologies de la santé,<sup>1</sup> we could not find any context clues indicating which body fluids were being suctioned and therefore we categorized those procedures as "suction of body fluids (not further specified).
